1 **Integrative Transcription Start Site Analysis and Physiological**  
2 **Phenotyping Reveal Torpor-specific Expressions in Mouse**  
3 **Skeletal Muscle**

4 Genshiro A Sunagawa<sup>1\*</sup>, Ruslan Deviatiiarov<sup>2</sup>, Kiyomi Ishikawa<sup>1</sup>, Guzel Gazizova<sup>2</sup>, Oleg  
5 Gusev<sup>2,3</sup> and Masayo Takahashi<sup>1</sup>

6 <sup>1</sup> Laboratory for Retinal Regeneration, RIKEN Center for Biosystems Dynamics Research,  
7 2-2-3 Minatojimaminami-machi, Chuo-ku, Kobe, Hyogo, 650-0047, Japan.

8 <sup>2</sup> Extreme Biology Laboratory, Institute of Fundamental Medicine and Biology, Kazan  
9 Federal University, 9 Paris Commune str., Kazan, Tatarstan, 420021, Russian Federation.

10 <sup>3</sup> RIKEN-KFU Translational Genomics Unit, RIKEN Innovation Center, 1-7-22 Suehiro-cho,  
11 Tsurumi-ku, Yokohama, Kanagawa, 230-0045, Japan.

12 \* Corresponding author: [genshiro.sunagawa@riken.jp](mailto:genshiro.sunagawa@riken.jp)

13

## 1 **SUMMARY**

2 Mice enter an active hypometabolic state, called daily torpor, when they experience a  
3 lowered caloric intake under cool ambient temperature ( $T_A$ ). During torpor, the oxygen  
4 consumption rate ( $VO_2$ ) drops to less than 30% of the normal rate without harming the  
5 body. This safe but severe reduction in metabolism is attractive for various clinical  
6 applications; however, the mechanism and molecules involved are unclear. Therefore, here  
7 we systematically analyzed the expression landscape of transcription start sites (TSS) in  
8 mouse skeletal muscles under various metabolic states to identify torpor-specific  
9 transcription patterns. We analyzed the soleus muscles from 38 mice in torpid, non-torpid,  
10 and torpor-deprived conditions, and identified 287 torpor-specific promoters. Furthermore,  
11 we found that the transcription factor ATF3 was highly expressed during torpor deprivation  
12 and that the ATF3-binding motif was enriched in torpor-specific promoters. Our results  
13 demonstrate that the mouse torpor has a distinct hereditary genetic background and its  
14 peripheral tissues are useful for studying active hypometabolism.

1 **KEYWORDS**

2 Daily torpor, hibernation, active hypometabolism, CAGE, transcriptome, transcription  
3 starting site, torpor deprivation.

4

## 1 INTRODUCTION

2 Mammals in hibernation or in daily torpor reduce their metabolic rate to 1-30% of that of  
3 euthermic states and enter a hypothermic condition without any obvious signs of tissue  
4 injury ([Bouma et al., 2012](#); [Geiser, 2004](#)). How mammals adapt to such a low metabolic rate  
5 and low body temperature without damage remains as one of the central questions in  
6 biology. Mammals maintain their  $T_B$  within a certain range by producing heat. In cold, the  
7 oxygen requirements for heat production increases, at a rate negatively proportional to the  
8 body size ([Heldmaier et al., 2004](#)). Instead of paying the high cost for heat production,  
9 some mammals are able to lower their metabolism by sacrificing body temperature  
10 homeostasis. This condition, in which the animal reduces its metabolic rate followed by  
11 whole-body hypothermia, is called active hypometabolism. As a result, the homeostatic  
12 regulation of body temperature is suppressed, and the total energy usage is spared. This  
13 hypometabolic condition is called hibernation when it lasts for a season, and daily torpor  
14 when it occurs daily.

15 Four conditions have been proposed to occur in active hypometabolism in  
16 mammals ([Sunagawa and Takahashi, 2016](#)): 1) resistance to low temperature, 2)  
17 resistance to low oxygen supply, 3) suppression of body temperature homeostasis, and 4)  
18 heat production ability under a low metabolic rate. Of these conditions, 1) and 2) were  
19 found to be cell/tissue-specific or local functions, which prompted researchers to analyze  
20 genome-wide molecular changes in various tissues of hibernators, including brain, liver,  
21 heart, skeletal muscles, and adipose tissues. A major role of differential gene expression in  
22 the molecular regulation of hibernation was first suggested by Srere with co-authors, who  
23 demonstrated both mRNA and protein upregulation of  $\alpha 2$ -macroglobulin during torpor in the  
24 plasma and liver of two ground squirrel species ([Srere et al., 1995](#)). With the development  
25 of high-throughput sequencing approaches, such as RNA-seq and microarrays, series of  
26 transcriptomic investigations were conducted in well-studied hibernating animals, including  
27 ground squirrels ([Hampton et al., 2011](#); [Schwartz et al., 2013](#); [Williams et al., 2005](#)), bears  
28 ([Fedorov et al., 2009, 2014](#); [Zhao et al., 2010](#)), and bats ([Lei et al., 2014](#); [Seim et al.,](#)  
29 [2013](#)). Recent proteomics studies in ground squirrels using two-dimensional gel

1 electrophoresis (Epperson et al., 2004; Martin et al., 2008) and shotgun proteomics (Shao  
2 et al., 2010) also explored the post-transcriptional regulation of hibernation. Furthermore,  
3 several studies demonstrated a strict epigenetic control of hibernation (Alvarado et al.,  
4 2015; Biggar and Storey, 2014), and a role of miRNAs in the process (Chen et al., 2013;  
5 Luu et al., 2016).

6 At the same time, due to the lack of detailed genome information about  
7 hibernators, i.e., squirrels, bats, and bears, the interpretation of high-throughput sequencing  
8 results is challenging. Instead, the mouse, *Mus musculus*, has rich genetic resources and  
9 could overcome this weakness. One noteworthy feature of this animal is the abundant  
10 variety of inbred strains and the diverse phenotypes. For example, the sleep phenotype  
11 (Franken et al., 1998; Koehl et al., 2003), circadian phenotype (Kopp, 2001; Schwartz and  
12 Zimmerman, 1990), cocaine response (Ruth et al., 1988), and reproductive system  
13 (Mochida et al., 2014) are well-known to show differences among inbred strains. Moreover,  
14 recent advances in genetic engineering make mice even more attractive for genetic  
15 tweaking at the organismal level. Transgenic animals in the F<sub>0</sub> generation are used to test  
16 genetic perturbation directly at the organismal level phenotypes in mice (Sunagawa et al.,  
17 2016; Wang et al., 2013). Notably, the mouse is well-known to enter daily torpor (Hudson  
18 and Scott, 1979), and we recently developed a method to reproducibly inducing torpor in  
19 mice (Sunagawa and Takahashi, 2016), making the mouse a suitable animal for studying  
20 hypometabolism.

21 The goal of this study was to analyze contribution of the genetic background to the  
22 torpor phenotype by introducing the mouse as model for active hypometabolism, taking  
23 advantage of the rich and powerful genetic technologies available for this animal. First, we  
24 found that two genetically close mice inbred strains, C57BL/6J (B6J) and C57BL/6NJcl  
25 (B6N), exhibit distinct torpor phenotypes; B6N has a higher metabolism during torpor and a  
26 lower rate of torpor entry. To clarify the genetic link to the mouse torpor phenotype, we  
27 performed Cap Analysis of Gene Expression (CAGE) in soleus muscles taken from 38  
28 animals under various metabolic conditions. We found that entering torpor and restoring  
29 activity were associated with distinct changes in the transcriptomic profile, including marked

- 1 changes in promoter shapes. Finally, we present evidence that the torpor-specific
- 2 promoters are related to the genetic differences in these inbred strains.

## 1 RESULTS

### 2 Torpor Phenotype in Mice is Affected by Genetic Background.

3 We previously showed that 100% of B6J mice enter daily torpor when they are deprived of  
4 food for 24 hours under a  $T_A$  of 12 to 24 °C (Sunagawa and Takahashi, 2016). B6N is an  
5 inbred strain that is genetically close to B6J (Simon et al., 2013). Despite their genetic  
6 resemblance, these two strains show significant differences in their sleep time (Sunagawa  
7 et al., 2016), reaction to cocaine (Kumar et al., 2013), and energy expenditure (Simon et al.,  
8 2013). Therefore, we decided to compare the daily torpor phenotype between these two  
9 strains.

10 First, we tested whether the torpor induction method developed for B6J could be  
11 applied to B6N. We set a B6N mouse into the test chamber on day 0 and used the 72-hour-  
12 data from the beginning of day 1 for analysis. Keeping the animal in a constant  $T_A$ , we  
13 removed the food for 24 hours from the beginning of day 2 (Figure 1A).  $T_B$  and  $VO_2$  were  
14 simultaneously recorded for 72 hours, and the first 24 hours of data were used to estimate  
15 the individual basal metabolism of the animal. The metabolism was evaluated every 6  
16 minutes, and when it was lower than the estimated baseline, the animal was defined to be  
17 in a low-metabolism condition. In this study, when the animal showed low metabolism  
18 during the latter half of the second day, which is the dark phase in which mice are normally  
19 active, the state was labeled as "torpor". Figure 1B shows a representative torpor pattern of  
20 a male B6N mouse. We tested the torpor entry rate of B6N mice by inducing torpor at  
21 various  $T_{AS}$ , (8, 12, 16, 20, 24 and 28 °C) (Figures S1A and S1B). B6N mice entered torpor  
22 at a peak rate of 100% at  $T_A = 16$  °C, but the rate decreased at higher or lower  $T_{AS}$  (Figure  
23 1C). Notably, at  $T_A = 8$  °C, more than 60% of the animals died without entering torpor. The  
24 overall entry rates were lower than those of B6J, which enter torpor at 100% when  $T_A = 12$   
25 to 24 °C (Sunagawa and Takahashi, 2016).

26 We next examined how the metabolism varied with the  $T_A$  changes in B6N mice.  
27 Specifically, the minimal  $VO_2$  and the minimal  $T_B$  during normal and torpid states over  
28 various  $T_{AS}$  were entered into a statistical model to obtain the posterior distributions of  
29 parameters of the thermoregulatory system (Sunagawa and Takahashi, 2016). Because

1 mice are homeothermic, the minimal  $T_B$  under normal conditions was expected to be  
2 unaffected by  $T_A$ . We calculated the unit-less slope  $a_1$  defined by the change in  $T_B$  against  
3 unit  $T_A$  change. When a specific total probability  $\alpha$  is given, the highest posterior density  
4 interval (HDPI) is defined by the interval of a probability density, which includes values more  
5 credible than outside the interval and the total probability of the interval being  $\alpha$ . In this  
6 case, the given dataset was predicted to have an 89% HDPI of  $a_1$  as [0.054, 0.103]  
7 (Figures 1D and S1C; hereafter, 89% HDPI will be indicated by two numbers in square  
8 brackets.). Thus, under normal conditions,  $T_B$  had a very low sensitivity against  $T_A$ ; when  $T_A$   
9 changed 10 degrees, the  $T_B$  changed no more than 0.5 to 1 degree. In contrast, during  
10 torpor, the minimal  $T_B$  was more sensitive to  $T_A$ , which was described by a larger  $a_1$  than  
11 under normal conditions ( $a_1$  during torpor was [0.166, 0.312]; Figures 1D and S1C). The  
12  $VO_2$  also differed between the normal and torpid conditions in B6N. In a homeothermic  
13 animal,  $VO_2$  decreases when  $T_A$  increases because less energy is needed for heat  
14 production. This was, indeed the case in B6N mice (Figure 1E). The slope  $a_2$  (ml/g/hr/°C),  
15 defined by the negative change in  $VO_2$  against unit  $T_A$  change, was estimated to be [0.199,  
16 0.239] ml/g/hr/°C under normal conditions (Figure S1D). During torpor, however, the  
17 animals reduced their  $VO_2$  to nearly half of value under the normal condition ( $a_2$  during  
18 torpor was [0.091, 0.126] ml/g/hr/°C; Figures 1E and S1D). Thus, both  $T_B$  and  $VO_2$  showed  
19 hypometabolic transitions during torpor in B6N mice.

20 To compare the function of the heat-production system between B6J and B6N, we  
21 estimated the negative feedback gain ( $H$ ) and the theoretical target temperature ( $T_R$ ) (°C) of  
22 B6N from the  $VO_2$  and  $T_B$  observed at various  $T_A$ s. As it was described in our previous  
23 study (Sunagawa and Takahashi, 2016), we applied the recorded  $VO_2$  and  $T_B$  to a statistical  
24 model. The estimated median  $H$  dropped 83.8% during torpor (Figures 1F and 1G) while  
25 the  $T_R$  dropped slightly (the estimated median  $T_R$  difference from normal to torpor was  
26 0.25 °C; Figures 1F and 1H). To compare these parameters with B6J mice, we recorded the  
27  $T_A = 28$  °C data missing in our previous study and recalculated both the  $H$  and  $T_R$  for B6J  
28 mice using  $T_A$ s of 8, 12, 16, 20, 24 and 28 °C (Figure S1E). In this case, they showed a  
29 94.0% drop in the estimated median  $H$  and 0.68 °C drop in  $T_R$  during torpor. Based on the



1 estimated distributions, during torpor, B6N mice had a smaller  $H$  than B6J ( $\Delta H$  was [0.020,  
2 0.366], which was totally positive; [Figure S1F](#)). Interestingly,  $\Delta T_R$  during torpor was [-1.47,  
3 3.33] °C, which included zero in the 89% HDPI, indicating that the difference between B6J  
4 and B6N was not clear in these groups ([Figure S1G](#)).

5 To confirm that the phenotype difference between B6N and B6J was not sex-  
6 specific, we recorded the torpor phenotypes of female B6J and female B6N at  $T_A = 20$  °C  
7 ([Figures S1H and S1I](#)). As observed in males, the females showed similar minimal  $T_R$  and  
8  $VO_2$  under the normal condition, and B6N showed a higher metabolic rate during torpor  
9 than B6J. During torpor, the estimated minimal  $T_B$  was [29.1, 33.9] °C and [23.4, 26.1] °C  
10 and minimal  $VO_2$  was [1.72, 3.12] ml/g/hr and [0.68, 0.96] ml/g/hr in B6N and B6J mice,  
11 respectively ([Figures 1I and 1J](#)). The posterior distribution of differences in the minimal  $T_B$   
12 and  $VO_2$  during torpor from B6J to B6N was [3.96, 9.56] °C and [0.89, 2.31] ml/g/hr,  
13 respectively. Both 89% HPDIs were greater than zero, which mean the probability that B6N  
14 has a higher minimal  $T_B$  and  $VO_2$  during torpor than B6J is greater than 89%.

15 Because inbred strains have an identical genomic background, our results strongly  
16 indicate that the torpor phenotype is related to the genomic difference between these two  
17 inbred strains. To examine this possibility, we crossed B6J and B6N and evaluated the  
18 torpor phenotype of their offspring. We performed two types of mating combinations: female  
19 B6N with male B6J (B6NJ-F1) and female B6J with male B6N (B6JN-F1). In both  
20 combinations, the F1 generations showed the B6J phenotype during torpor ([Figure 1K](#)).  
21 Both the minimal  $T_B$  and the minimal  $VO_2$  during torpor of B6J, B6NJ-F1, and B6JN-F1  
22 were lower than that of B6N ([Figure S1J](#)).

23 All of these results indicated that the hypometabolic phenotype during torpor is  
24 inheritable. Interestingly, B6N and B6J only have 140,111 SNP bases ([Keane et al., 2011](#)).  
25 We next examined the hypothesis, that there should be certain genetic variation in two  
26 strains associated with genes or regulatory elements contributing to control of torpor.  
27 Because B6N and B6J did not have a difference in  $T_R$  ([Figures 1F and S1E](#)), which is  
28 regulated in the thermoregulatory center located in the hypothalamus ([Nakamura, 2011](#)),  
29 we hypothesized that the phenotypic difference between B6N and B6J occurs in the

1 peripheral tissue. Therefore, we used peripheral muscle to test for torpor-specific RNA  
2 expressions and to identify the responsible genetic network for torpor.

3

#### 4 **Fasting-induced Torpor Shows a Reversible Transcriptome Signature.**

5 Animals in active hypometabolism return to the normal condition without any damage even  
6 after experiencing extreme hypothermic and hypometabolic conditions. To analyze  
7 reversibility in peripheral tissue gene expression during torpor, we isolated soleus muscles  
8 on day 1 (Pre, n = 4), 2 (Mid, n = 8) and 3 (Post, n = 4) at ZT-22 as experiment #1 ([Figure](#)  
9 [2A](#)). We chose these time points because B6J mice usually start to enter torpor at around  
10 ZT-14, and at ZT-22, which is two hours before the light is turned on, the animals are very  
11 likely to be in a torpid state ([Sunagawa and Takahashi, 2016](#)). Indeed, the  $VO_2$  was higher  
12 in the Pre and Post groups, and was lowest in the Mid group ([Figure 2B](#)). Skeletal muscle is  
13 a popular tissue for hibernation research because they show little atrophy even during  
14 prolonged immobility. Therefore, a considerable number of transcriptomic and proteomic  
15 studies have been performed in the past ([Bogren et al., 2017](#); [Fedorov et al., 2014](#);  
16 [Hampton et al., 2011](#); [Hindle and Karimpour-Fard, 2011](#); [Muleme et al., 2006](#)), which  
17 encouraged us to choose skeletal muscle as a target tissue. We extracted the RNA from  
18 the muscle samples, and performed single-molecule sequencing combined with CAGE  
19 ([Kanamori-Katayama et al., 2011](#); [Kodzius et al., 2006](#)). This method allowed us to evaluate  
20 the genome-wide distribution and quantification of TSSs in these tissues. Based on the TSS  
21 distribution, we identified 12,862 total CAGE clusters (promoters). Among all the promoters,  
22 11,133 were associated with 10,615 genes.

23 The multidimensional scaling (MDS) plot of the promoter-level RNA expression  
24 showed that the Pre and Post groups had distinct expression profiles from the Mid group  
25 ([Figures 2C and 2D](#)). During torpor, the animal may show both high and low metabolism  
26 due to the oscillatory nature of this condition (note the wavy pattern of  $VO_2$  in [Figure 1B](#)).  
27 Indeed, the animal in the Mid group showed a broad diversity of metabolic rates ([Figure](#)  
28 [2B](#)). Each number in [Figures 2B and 2C](#) represents the same animal in the Mid group.  
29 Despite the broad metabolism range during torpor ([Figure 2B](#)), the CAGE cluster profile did

1 not show clustering within the Mid group according to metabolic state (Figures 2C and 2D),  
2 indicating that the hourly oscillatory change in metabolism during torpor is based on a  
3 transcription-independent mechanism.

4 To test the reproducibility of this experiment, we performed another independent  
5 set of samplings and CAGE analysis (experiment #2). We obtained 2, 5, and 3 samples for  
6 the Pre, Mid, and Post states, respectively. In experiment #2, the  $VO_2$  at sampling showed  
7 a similar pattern as in experiment #1 (Figure S2A), and the MDS plot showed that the Pre  
8 and Post groups had a distinct transcriptome profile from the Mid group (Figures S2B and  
9 S2C). These results were consistent with those of experiment #1.

10 To gain insight into the biological process underlying the reversible expression  
11 during torpor, we analyzed differentially expressed (DE) genes on the level of promoters in  
12 the Pre to Mid and in the Mid to Post conditions. The promoters were considered  
13 differentially expressed when the false discovery rate (FDR) was smaller than 0.05.  
14 Reversibly up-regulated DE promoters were defined if they show a significant increase from  
15 the Pre to Mid (FDR < 0.05) and decrease from the Mid to Post (FDR < 0.05). Reversibly  
16 down-regulated DE promoters were similarly defined but in the opposite direction (Figure  
17 2E). We found 589 up-regulated and 277 down-regulated promoters (representing 481 and  
18 221 genes) from the 12,863 total promoters, with enrichment in several distinct KEGG  
19 pathways. The top 10 enriched GO terms and KEGG pathways related to both the  
20 reversibly up- and down- regulated DE genes are shown in Figures 2F and 2G.  
21 Furthermore, we found enrichment of certain motifs in the promoters with reversible  
22 dynamics of expression (Figures S2D and S2E). Finally, every up- and down-regulated DE  
23 promoter was ranked in the order of the total fold-change, which was the sum of the fold-  
24 changes in both the Pre to Mid and the Mid to Post (Figures 2H and 2I).

25 To exclude the possibility that the difference we observed was the direct effect of  
26 starvation and not the low metabolism, we further analyzed the transcriptomic profile of  
27 mouse muscles under several conditions that can prevent the animal from entering torpor.

28

## 1 **Torpor Prevention at High $T_A$ Revealed Hypometabolism-associated Promoters.**

2 Torpor can be induced by removing food for 24 hours only when the animal is placed in a  
3 relatively low  $T_A$ . We have shown that B6J mice enter torpor at a rate of 100% from  $T_A =$   
4  $12^\circ\text{C}$  up to  $T_A = 24^\circ\text{C}$  (Sunagawa and Takahashi, 2016) and that some animals stop  
5 entering torpor at  $T_A = 28^\circ\text{C}$  (Figures S3A and S1E). We further tested whether the animals  
6 could enter torpor at  $T_A = 32^\circ\text{C}$  (Figure S3B). In this warm condition, even if the animals  
7 were starved they did not enter torpor, possibly due to the lack of heat loss than at lower  
8  $T_A$ s. Taking these two requirements into account, fasting and low  $T_A$ , we designed two  
9 torpor-preventive conditions and compared the expression in the muscles under these  
10 conditions to that under the ideal torpor state (Figure 3A). One is a high  $T_A$  (HiT)  
11 environment and the other is a non-fasted (Fed) condition. Both conditions prevented the  
12 animals from inducing torpor, because the two essential requirements were lacking. We  
13 then, compared the tissue from these conditions to the ideal torpid tissue, which was from  
14 fasting animals at a low  $T_A$ , and obtained the transcripts that were differentially expressed  
15 from torpor in each non-torpor condition. The expression differences shared in these two  
16 experiments would be those affected by both low  $T_A$  and fasting, and therefore would be the  
17 essential expressions for active hypometabolism, hereafter defined as hypometabolic  
18 promoters.

19 We first compared the  $VO_2$  in the HiT and Fed groups against the Mid group  
20 (Figure 3B). Even though both groups had no animals entering torpor, the HiT group  
21 showed a lower  $VO_2$  while the Fed group showed a higher metabolism. Next, we compared  
22 the expression profile acquired from the CAGE analysis of tissues from both groups. The  
23 MDS plot and hierarchical clustering showed that the Mid, Fed, and HiT groups consisted of  
24 independent clusters (Figures 3C and 3D). This finding indicated that the expressions  
25 during torpor (Mid group) were distinct from those during starvation alone (HiT) or at low  $T_A$   
26 alone (Fed).

27 To extract the hypometabolic promoters, we performed the DE analysis (Figure  
28 3E) between the HiT to Mid and the Fed to Mid. CAGE clusters up-regulated in both the HiT  
29 to Mid and the Fed to Mid were those that were upregulated during torpor regardless of the

1 initial condition, i.e., warm  $T_A$  or no fasting (green dots in [Figure 3E](#)). There were 330 of  
2 these up-regulated hypometabolic promoters from the total 12,863. On the other hand,  
3 CAGE clusters that were down-regulated in both the HiT to Mid and the Fed to Mid, were  
4 promoters that were down-regulated regardless of the initial condition, and thus were the  
5 down-regulated hypometabolic promoters (red dots in [Figure 3E](#)). The enrichment analyses  
6 of GO terms and KEGG pathways were performed ([Figures 3F and 3G](#)), and the motifs  
7 enriched in the hypometabolic promoters were also analyzed ([Figures S3C and S3D](#)). The  
8 top five promoters that had annotated genes nearby are listed as up- and down-regulated  
9 hypometabolic promoters in [Figures 3H and 3I](#), respectively.

10           These results showed that considerable numbers of genes are involved in the  
11 active hypometabolic process independent from the responses to both hunger and cold.  
12 One of these genes, *Ppargc1a*, which was found at the top of the up-regulated  
13 hypometabolic promoters, was also found at the top of up-regulated reversible promoters  
14 ([Figure 2H](#)). This is a good candidate for a torpor-specific gene, because it belongs to both  
15 the reversible and the hypometabolic group in this study. Therefore, we next merged the  
16 results of the reversible and the hypometabolic promoters to specify the torpor-specific  
17 promoters and elucidate the fundamental transcriptional network of active hypometabolism  
18 in peripheral tissues.

## 19 20 **Identification of Torpor-specific Promoters and their Dynamics.**

21 Our two independent analyses, which focused on two essential torpor characteristics, i.e.,  
22 reversibility and hypometabolism, revealed that the skeletal muscle of torpid mice has a  
23 specific transcriptomic pattern. Combining these results, we obtained torpor-specific  
24 promoters, defined as the intersection of the reversible and the hypometabolic promoters.  
25 We found 226 up-regulated and 61 down-regulated torpor-specific promoters ([Figure 4A](#)).  
26 The top five promoters ordered according to the sum of the fold-change observed in the two  
27 groups (reversible and hypometabolic promoters) are shown in [Figures 4B and 4C](#).  
28 Remarkably, "protein binding" in the molecular function category in the GO terms was listed  
29 in the top ten enriched GO terms ([Figure S4A](#)). This group includes various protein-binding

1 genes products, including transcription factors. To highlight the predominant transcriptional  
2 pathway related to torpor, we ran an enrichment study of KEGG pathways with the torpor-  
3 specific promoters. We obtained 13 pathways that showed statistically significant  
4 enrichment (Figure 4D). In particular, the mTOR pathway, which includes various metabolic  
5 processes related to both hibernation and starvation, was identified (Figure S4B).  
6 Furthermore, we analyzed the enriched motifs in the torpor-specific promoters (Figures S4C  
7 and S4D) and found 131 significantly enriched motifs out of 579 motifs registered in  
8 JASPAR 2018 (Khan et al., 2018).

9 CAGE analysis can detect TSSs at single base-pair resolution, and therefore, it  
10 can be used to estimate the architecture of the promoter (Raborn et al., 2016). Shape index  
11 (SI) is one of the major indices used to evaluate promoter architecture (Hoskins et al.,  
12 2011). "Narrow" promoters initiate transcription at specific positions, while "broad"  
13 promoters initiate transcription at more dispersed regions. It is widely accepted that the  
14 promoter shape differs among different tissues or conditions (Forrest et al., 2014; Lizio et  
15 al., 2017). To detect promoter dynamics in the skeletal muscle under different metabolic  
16 conditions, we analyzed the promoter shape of each of the detected promoters in the  
17 reversible, hypometabolic, and torpor-specific groups (Figure 4E). In the torpor-specific  
18 groups, the down-regulated promoters showed a significantly different shape when  
19 compared to all muscle promoters (Figure 4F), while the GC richness did not show a  
20 difference (Figure S4E).

21 The torpor-specific promoters we found may represent regulators both upstream  
22 and downstream of the torpor transcriptional network. To further elucidate the early events  
23 involved in torpor-specific metabolism in peripheral tissues, it was necessary to place the  
24 animal in a condition where it had an unusually strong tendency to enter torpor, and to  
25 compare the muscle gene expression with that of normal torpor entry. For this, we  
26 mimicked the classical technique, sleep deprivation, which is frequently used in basic sleep  
27 research (Tatsuki et al., 2016; Wang et al., 2018), and performed torpor deprivation by  
28 gently touching the animal. Even when the mouse was not allowed to enter torpor, the  $VO_2$   
29 was close to that of Mid-torpor animals (Figure S4F). Furthermore, the transcriptome profile

1 in the muscles from torpor-deprived animals did not show a clear difference from Mid-torpor  
2 animals in MDS plots (Figure S4G). When compared to Mid-torpor muscles, the torpor-  
3 deprived muscles had 45 up- and 27 down-regulated promoters (Figure 4G). Among these  
4 72 torpor-deprivation-specific promoters, one promoter starting at the minus strand of  
5 chromosome 1: 191217941, namely the promoter of the activating transcription factor 3  
6 (*atf3*) gene, was also found in the torpor-specific promoters (Figure 4H). Surprisingly, the  
7 binding site of ATF3 was one of the motifs enriched in the torpor-specific promoters (Figure  
8 S4H). The Atf3 motif was found in 33 of 289 torpor-specific promoters, and the peak of the  
9 motif probability was at 79 bp upstream of the TSS (Figure 4I).

10 These results showed that tissues of torpid mice have a torpor-specific  
11 transcription signature. We also found that one of the torpor-specific genes, encoding  
12 transcription factor ATF3 was more highly expressed during torpor deprivation.  
13 Furthermore, the ATF3-binding motif was found to be enriched in torpor-specific promoters.  
14 These findings were indicative of a novel pathway of active hypometabolism in peripheral  
15 tissues, possibly initiated by the torpor drive-correlated transcription factor ATF3. Finally, we  
16 analyzed our promoter-based expression data with respect to the SNPs of B6J and B6N, to  
17 find evidence that may explain the phenotypic difference between these two inbred strains.

### 18 19 **Genetic Link of Distinct Torpor Phenotypes in Inbred Mice.**

20 The classic laboratory mice B6J and B6N have very few genome differences, while they  
21 show distinct torpor phenotypes (Figure 1K). We discovered that the muscles in B6J mice  
22 show torpor-specific expressions (Figure 4A). Because our data were analyzed by CAGE-  
23 seq, the promoter information, which is usually non-coding sequences, is directly available.  
24 Because most SNPs are found in non-coding regions, it is reasonable to analyze the SNP  
25 enrichment at the promoter regions of the torpor-specific expressions to explain the  
26 B6J/B6N difference.

27 First, we tested whether the 13 torpor-specific pathways (Figure 4D) were affected  
28 by SNPs that are different between B6J and B6N (B6J/B6N). The SNPs located in the  
29 promoter region of the genes included in the pathways were counted, and the enrichment

1 was compared to the baseline to test the significance (Figure 5A). All 13 pathways showed  
2 significant enrichment ( $p < 0.05$ ) indicating that the SNPs in B6J/B6N are strongly involved  
3 in the torpor-specific pathways.

4 Next, we tested the enrichment of SNPs at each promoter group. There were two  
5 up- and four down-regulated promoters in the torpor-specific group that had at least one  
6 SNP (Figure 5B). Possibly due to the low number of SNPs in this dataset, we were not able  
7 to confirm a significant enrichment in torpor-specific promoters. The detailed position of the  
8 SNP in six promoters; *Plin5* and *Sik3* as up-regulated and *Creb3l1*, *Bhlhe40*, *Rrad*, and  
9 *Lrn1* as down-regulated promoters, are illustrated in Figures S5A and S5B.

10 Finally, we tested how the SNPs were distributed in the promoter region in each  
11 group. We calculated the SNP density at a given position from the TSS (Figure 5C). The  
12 results indicated that SNPs tended to be enriched 5 kbp upstream from the TSS of torpor-  
13 specific down-regulated promoters.

14 These results collectively indicated that B6J/B6N SNPs may explain the torpor  
15 phenotype difference in these two strains. In particular, the SNPs that were highly enriched  
16 in the torpor-specific pathways designated the possible origin of the dissimilar torpor  
17 phenotypes.



## 1 **DISCUSSION**

### 2 **Mouse Torpor as a Model System for Active Hypometabolism**

3 One goal of this study was to introduce mouse torpor as a study model for active  
4 hypometabolism. Hibernation is the most extreme phenotype of active hypometabolism,  
5 and there is a physiological distinction between hibernation and daily torpor ([Ruf and](#)  
6 [Geiser, 2015](#)). We recently showed that mouse torpor shares a common thermoregulation  
7 mechanism with hibernation in which the sensitivity of the thermoregulatory system is  
8 reduced ([Sunagawa and Takahashi, 2016](#)).

9 In this study, we extended our previous work by evaluating another inbred strain  
10 B6N. Despite the close genetic distance between B6N and B6J, we found that they had  
11 distinct torpor phenotypes ([Figures 1F and S1E](#)) due to a difference in heat production  
12 sensitivity ([Figure S1F](#)). Various inbred strains are reported to have distinct phenotypes,  
13 indicating a genetic involvement in torpor phenotypes ([Dikic et al., 2008](#)). Our findings  
14 strengthen this idea, because B6N and B6J have a very small genetic difference but a clear  
15 difference in torpor phenotypes. We also showed that the inbred strain-specific torpor  
16 phenotype is inheritable ([Figures 1K and S1J](#)), further validating the link between genetic  
17 background and torpor phenotype.

18

### 19 **Torpor-specific Transcriptions Differ from those of Hibernation and Starvation**

20 In this study, we identified 287 torpor-specific promoters in mouse skeletal muscle ([Figure](#)  
21 [4A](#)). Specificity was assured by including both reversible and hypometabolic promoters  
22 ([Figures 2A and 3A](#)). The results enabled us to identify likely metabolic pathways that are  
23 enriched during torpor ([Figure 4D](#)).

24 Circadian rhythm was the most enriched KEGG pathway by torpor-specific  
25 promoters ([Figure 4D](#)). The circadian clock is important in organizing metabolism and  
26 energy expenditure ([Tahara and Shibata, 2013](#)). In our study, the core circadian clock gene  
27 *per1* was up-regulated torpor-specifically, and *arntl1* was up-regulated in the reversible  
28 experiment. Because *per1* and *arntl1* are normally expressed in reversed phases, our  
29 results in which both components were up-regulated together indicated that the circadian

1 clock was disrupted in the skeletal muscle during torpor. Most past studies have focused on  
2 the involvement of the central circadian clock (Ikeno et al., 2017; Revel et al., 2007), while  
3 little is known about the peripheral circadian clock in torpid animals (Jansen et al., 2016).  
4 Thus, our results may provide evidence that the peripheral clock is disrupted during active  
5 hypometabolism.

6 Similarities between fasting during hibernation or daily torpor and calorie restriction  
7 in non-hibernating mammals are reported (Xu et al., 2013b). During long-term torpor, such  
8 as in hibernating mammals, carbohydrate-based metabolism switches to lipid use. Many  
9 studies have suggested that the activation of AMPK is important in torpor induction  
10 (Lanaspa et al., 2015; Melvin and Andrews, 2009; Zhang et al., 2015). However, another  
11 study demonstrated AMPK activation only in white adipose tissue, not in the liver, skeletal  
12 muscle, brown adipose tissue, or brain, during hibernation (Horman et al., 2005). Our study  
13 corroborates the findings of Horman's research, by demonstrating no significant changes in  
14 the AMPK-encoding gene expression during torpor in skeletal muscle.

15 The PPAR-signaling pathway also regulates lipid metabolism. Numerous studies  
16 have shown increased PPARs in various organs at the mRNA and protein levels during  
17 torpor, in several hibernating species (Han et al., 2015; Xu et al., 2013b). Recently, an over-  
18 expression of PPAR $\alpha$  protein in mouse liver, comparable to that in hibernating bats was  
19 reported, suggesting a potential hibernation capability of mice (Han et al., 2015). According  
20 to our data, *Ppara* is upregulated in torpid mice muscle along with several target genes  
21 associated with cholesterol metabolism and fatty acid transport. Remarkably, *Ppargc1a*  
22 gene, encoding PGC-1 $\alpha$  (peroxisome proliferator-activated receptor- $\gamma$  coactivator-1) was  
23 also over-expressed in mice during torpor. Recently, PGC-1 $\alpha$  activation was suggested to  
24 be responsible for protecting skeletal muscle from atrophy during long periods of torpor in  
25 hibernators (Xu et al., 2013a). Our results suggest that a similar pathway may be activated  
26 in mouse torpor as well.

27 We found that the insulin/Akt and mTOR signaling pathways, which have roles in  
28 skeletal muscle remodeling and metabolic rate depression, were enriched. Previous studies  
29 showed that insulin signaling is inhibited in the skeletal muscle of torpid gray mouse lemurs

1 (Tessier et al., 2015) and that the Akt kinase activity is suppressed during torpor in multiple  
2 tissues of ground squirrels (Abnous and Storey, 2008; Cai et al., 2004; Wu and Storey,  
3 2012). The suppressed Akt activity is accompanied by a reduction in mTOR activation,  
4 leading to a state of protein synthesis inhibition during torpor in hibernators (Lee et al.,  
5 2010; McMullen and Hallenbeck, 2010; Wu and Storey, 2012). Our results demonstrated a  
6 down-regulation of *igf1*, which encodes IGF-1, and an activation of *mtor*, which encodes  
7 mTOR, in torpor, which appear to be paradoxical to past studies.

8           The Insulin/Akt pathway also controls the phosphorylation and activation of the  
9 FOXO1 transcription factor, a disuse atrophy signature that upregulates the muscle-specific  
10 ubiquitin ligases *trim63* (MuRF1) and *fbxo30* (Atrogin-1). In our study, we found that  
11 FOXO1, MuRF1, and Atrogin-1 were up-regulated, as in the case of disuse atrophy in mice  
12 and rats (Sandri et al., 2004; Senf et al., 2010).

13           In summary, we found that the up-regulation of PGC-1 $\alpha$  and down-regulation of  
14 IGF-1 in the skeletal muscle of torpid mice are similar to hibernating animals, in which they  
15 contribute to muscle protection and the suppression of protein synthesis. On the other  
16 hand, muscle atrophy and autophagy signatures such as FOXO1, MuRF1, and Atrogin-1  
17 were up-regulated during torpor, indicating that atrophic changes is also progressed.  
18 Furthermore, mTOR activation was found, which is a signature of muscle hypertrophy.  
19 Thus, we can conclude that mouse torpor has a unique transcription profile, sharing  
20 signatures with hibernation, starvation-induced atrophy, and muscle hypertrophy.

21

## 22 **Dynamics of Torpor-specific Transcriptions**

23 The deep CAGE technology enabled us to evaluate the dynamics of the torpor-specific  
24 promoters. We found that down-regulated torpor-specific promoters were narrower than  
25 other muscle promoters (Figures 4E and 4F). However, the GC content of the torpor  
26 promoters was not significantly different from that of all muscle promoter regions (Figure  
27 S4E): approximately half of the TSSs were located in CpG islands, in which both AT- and  
28 GC-rich motifs were overrepresented (Figures S4C and S4D).

29           To gain insight about the upstream network of torpor, we evaluated a torpor-

1 deprived condition. Note that this dynamic state, the torpor-deprived condition, is very  
2 difficult to induce in hibernators, because very little stimulation can cause them to halt  
3 torpor induction. Taking advantage of this torpor-deprivation state in mice, we identified  
4 transcription factor ATF3 as a candidate factor that is correlated with the need to enter  
5 torpor. *Atf3* is a well-known stress-inducible gene (Hai and Hartman, 2001). Recent  
6 cumulative evidence suggests ischemia/reperfusion significantly induce ATF3 expression in  
7 various organs (Lee et al., 2013; Rao et al., 2015; Yoshida et al., 2008). In the current  
8 study, *Atf3* was identified not only as a stress-induced gene, but also as a torpor-drive  
9 correlated factor. Torpor is an active-hypometabolic condition, which can be described as a  
10 physiological ischemia. Although we lack direct evidence, we propose the hypothesis that  
11 *Atf3* may be a factor mediating the initiation of hypometabolism, and because of that, it is  
12 expressed to protect the organs under stressful conditions such as ischemia.

13 Another advantage of deep CAGE is the rich information obtained about the  
14 promoter region of the expression of interest. This study exploited our finding that B6J and  
15 B6N have different torpor phenotypes. To identify which SNP was responsible for the  
16 phenotype difference, we used all of the data acquired in this study. Although the down-  
17 regulated torpor-specific promoters tended to have more SNPs, we were unable to identify  
18 specific SNPs related to the torpor phenotype from observation (Figure 5B). Therefore,  
19 further study is needed to test how the candidate SNPs (Figures S5A and S5B) affect the  
20 torpor phenotype by genetic intervention.

21

## 22 **Fundamental Understanding of Active Hypometabolism for Medical Applications**

23 The overall results of this study indicate that the mouse is an excellent animal for studying  
24 the as-yet-unknown mechanisms of active hypometabolism. Understanding the core engine  
25 of the hypometabolism in torpid tissues will be the key to enabling non-hibernating animals,  
26 including humans, to hibernate. Inducing active hypometabolism in humans would be an  
27 important breakthrough for many medical applications (Bouma et al., 2012). The benefits to  
28 using mice are not limited to technological advances in genetics, but extend to the  
29 enormous potential for *in vitro* studies using cell or tissue culture. In stem cell biology,

1 patient-derived stem cells represent a valuable resource for understanding diseases and  
2 developing treatments, because the cells reflect the phenotype of the patient ([Avior et al.,](#)  
3 [2016](#)). We believe, similarly, that mouse-derived stem cells or tissues will provide a unique  
4 platform for investigating strain-specific hypometabolic phenotypes in animals. Moreover,  
5 because *in vitro* studies can be easily extended to experiments using human cells/tissue  
6 derived from human induced pluripotent stem cells, active hypometabolism research in  
7 mouse cells/tissues is an important step toward the realization of human hypometabolism.

## 1 **EXPERIMENTAL PROCEDURES**

### 2 **Animals**

3 All animal experiments were performed according to the guidelines for animal experiments  
4 of the RIKEN Center for Biosystems Dynamics Research and approved by the Animal  
5 Experiment Committee of the RIKEN Kobe Institute. C57BL/6NJcl mice were purchased  
6 from CLEA Japan, Inc. and C57BL/6J mice were from Oriental Yeast Co., Ltd. Until the  
7 mice were used in torpor experiments, they were given food and water ad libitum and  
8 maintained at a  $T_A$  of 21 °C, a relative humidity of 50%, and with a 12-hr light/12-hr dark  
9 cycle. The  $T_B$  and the  $VO_2$  of the animal were continuously recorded by an implanted  
10 telemetry temperature sensor (TA11TA-F10, DSI) and by respiratory gas analysis (ARCO-  
11 2000 mass spectrometer, ARCO system), respectively. See SUPPLEMENTAL  
12 EXPERIMENTAL PROCEDURES for details.

13

### 14 **Non-Amplified non-Tagging Illumina Cap Analysis of Gene Expression (nAnt-iCAGE)**

#### 15 **Library Preparation and Sequencing**

16 RNA was isolated from sampled tissues (see SUPPLEMENTAL EXPERIMENTAL  
17 PROCEDURES). Transcriptomics libraries were prepared according to a standard protocol  
18 for the CAGE method by using 5 µg of extracted total RNA from mouse muscles ([Murata et](#)  
19 [al., 2014](#)). The RNA was used as a template for the first strand cDNA synthesis, which was  
20 then biotinylated at the 5'-end to allow streptavidin capture. Linkers were then attached at  
21 the 5' and 3' ends, and the second strand cDNA was synthesized. The quality of the  
22 libraries was verified using a Bioanalyzer 2100 (Agilent), and the yield was validated by  
23 qPCR. The single-end libraries were then sequenced on a NextSeq platform (Illumina) or  
24 on a HiSeq 250 platform using Rapid Run mode (Illumina), in experiment #1 and #2,  
25 respectively.

26

#### 27 **Mapping, Peaks Calling, and Annotation**

28 Sequenced reads were trimmed and mapped on the mouse mm10 genome assembly using  
29 bwa and hisat2 ([Kim et al., 2015](#); [Li and Durbin, 2010](#)). For each sample, we obtained

1 CAGE-defined TSSs (CTSSs) according to the reads abundance, and then clustered them  
2 using PromoterPipeline ([Arnaud et al., 2016](#)), the highest peaks were annotated as TSSs.  
3 These CAGE clusters were then associated with their closest genes using the Ensembl and  
4 Refseq transcripts annotation available for mm10. The accession number for the  
5 sequencing data reported in this work is GEO: GSE117937.

## 1 **ACKNOWLEDGMENTS**

2 We thank the LARGE, RIKEN BDR for housing the mice. This work was supported by the  
3 RIKEN Special Postdoctoral Researcher program (G.A.S.) and by Grant-in-Aid for Scientific  
4 Research on Innovative Areas (Thermal Biology) 18H04706 from MEXT (G.A.S.).

5



## 1 **AUTHOR CONTRIBUTIONS**

2 G.A.S., O.G., and M.T. designed the study. G.A.S and K.I. performed the animal  
3 experiments and tissue sampling, supervised by G.G. R.D. and G.A.S. analyzed the data.  
4 G.A.S., R.D., G.G., and G.O. wrote the manuscript. All authors discussed the results and  
5 commented on the manuscript text.

1 **ADDITIONAL INFORMATION**

2 **Competing financial interests:** The authors declare no competing financial interests.

3

## 1 **FIGURE LEGENDS**

### 2 **Figure 1. Torpor Phenotype is Affected by Genetic Background.**

3 (A) Protocol for fasting-induced daily torpor in a mouse.

4 (B) Representative metabolic transition of mouse daily torpor. Red and blue lines denote  $T_B$   
5 and  $VO_2$ , respectively. Filled circles on the line are time points evaluated as "torpor".

6 (C) Torpor entry rate in the male B6N mouse. It peaked at  $T_A = 16$  °C.

7 (D) (E) Minimal  $T_B$  and  $VO_2$  of male B6N at various  $T_A$ s. In these and the following panels,  
8 green and blue denote the normal and torpid states, respectively. Dots with the vertical  
9 error bars denote the observed mean and SEM of the minimal variables [ $T_B$  in (D),  $VO_2$  in  
10 (E)] at each  $T_A$ , and the line and shaded area denote the mean and the 89% HPDI intervals  
11 of the estimated minimal variables.

12 (F) Relationship between minimal  $T_B$  and  $VO_2$  seen during normal and torpid states at  
13 various  $T_A$ s. Darkness of the dot indicates the  $T_A$ . The horizontal intercept of the line  
14 indicates the theoretical set-point of  $T_B$ , which is  $T_R$ . In the normal state,  $T_B$  is kept relatively  
15 constant by using oxygen and producing heat to fill the gap between  $T_R$  and  $T_A$ . On the  
16 other hand, during daily torpor, the sensitivity against  $T_B$  is weakened, which is visualized  
17 by a less steep slope.

18 (G) Posterior distribution of the estimated  $H$  during the normal state and torpor. The lack of  
19 overlap strongly suggests that  $H$  is different between these two conditions.

20 (H) Posterior distribution of the estimated  $T_R$  during normal state and torpor. The high  
21 overlap of the two distributions suggests that  $T_R$  is indistinguishable between these two  
22 conditions.

23 (I) (J) Minimal  $T_B$  and  $VO_2$  of female B6N at  $T_A = 20$  °C. Lighter color is B6J, and darker is  
24 B6N. Upper panel shows the posterior distribution of the estimated minimal  $T_B$  and  $VO_2$ ,  
25 and the lower panel shows the raw data for each group.

26 (K) Minimal  $T_B$  and  $VO_2$  of male mice at  $T_A = 20$  °C. B6NJ-F1 is the offspring of a B6N  
27 mother and B6J father. Note that the higher metabolic rate in the torpor phenotype of B6N  
28 disappears when crossed with B6J.

29

1 **Figure 2. Fasting-induced Torpor Shows a Reversible Transcriptome Signature.**

2 (A) Protocol for sampling muscles from Pre, Mid, and Post torpor animals to test the  
3 reversibility of the transcriptional profile of muscles during torpor.

4 (B) Boxplots for the  $VO_2$  of animals at sampling in the reversibility experiment #1. Each dot  
5 represents one sample from one animal. During torpor (Mid group), the median  $VO_2$  was  
6 lower than during Pre or Post torpor. The band inside the box, the bottom of the box, and  
7 the top of the box represent the median, the first quartile ( $Q_1$ ), and the third quartile ( $Q_3$ ),  
8 respectively. The interquartile range (IQR) is defined as the difference between  $Q_1$  and  $Q_3$ .  
9 The end of the lower whisker is the lowest value still within 1.5 IQR of  $Q_1$ , and the end of  
10 the upper whisker is the highest value still within 1.5 IQR of  $Q_3$ . Every other boxplot in this  
11 manuscript follows the same annotation rules. The numbers in the Mid torpor group are  
12 identification numbers of the animals.

13 (C) MDS plot of the TSS-based distance in reversibility experiment #1. Each dot represents  
14 one sample from one animal. The Mid group clustered differently from the Pre and Post  
15 groups in the 1st dimension. The two internal groups seen in the Mid group in [Figure 2B](#)  
16 were not evident in this plot, indicating the transient metabolic change during torpor was not  
17 correlated with transcription.

18 (D) Hierarchical clustering heatmap based on the TPM of TSS detected in the reversibility  
19 experiment #1.

20 (E) Distribution of CAGE clusters according to the fold-change in the TPM of Pre to Mid and  
21 Mid to Post torpor. The top five up- and down-regulated reversible promoters that had  
22 annotated downstream genes are shown.

23 (F) Top ten enriched GO terms in the reversible promoters.

24 (G) Top ten enriched KEGG pathways in the reversible promoters.

25 (H) (I) Top five up- and down-regulated reversible promoters ordered according to the  
26 magnitude of the TPM change. Promoters that had annotated downstream genes are  
27 shown.

28

1 **Figure 3. Torpor Prevention at high  $T_A$  Revealed Hypometabolism-associated**  
2 **Promoters.**

3 (A) Protocol for detecting the hypometabolic expression by sampling muscles from two  
4 groups in which torpor was prevented (HiT and Fed groups,  $n = 4$  for each). For the torpid  
5 group, the samples collected in the reversibility test was used (Mid group,  $n = 8$ ).

6 (B) Boxplots for the  $VO_2$  of animals at sampling in the hypometabolic experiment. Each dot  
7 represents one sample from one animal. During torpor prevention by high- $T_A$  (HiT group),  
8 the  $VO_2$  was lower than in the Mid group, and when torpor was prevented by food  
9 administration (Fed group),  $VO_2$  was higher than in the Mid group.

10 (C) MDS plot of the TSS-based distance in the hypometabolic experiment. Each dot  
11 represents one sample from one animal. The Mid, Fed, and HiT groups were clustered  
12 separately.

13 (D) Hierarchical clustering heatmap based on TPM of the TSS detected in the  
14 hypometabolic experiment.

15 (E) Distribution of CAGE clusters according to the fold-change in TPM of the HiT to Mid and  
16 Fed to Mid groups. The top five up- and down-regulated hypometabolic promoters that had  
17 annotated downstream genes are shown.

18 (F) The top ten enriched GO terms in the hypometabolic promoters.

19 (G) The top ten enriched KEGG pathways in the hypometabolic promoters.

20 (H) (I) The top five up- and down-regulated hypometabolic promoters ordered according to  
21 the magnitude of the TPM change. Promoters that had annotated downstream genes are  
22 shown.

23

1 **Figure 4. Identification of Torpor-specific Promoters and their Dynamics.**

2 (A) Torpor-specific promoters were defined by the intersection of reversible and  
3 hypometabolic promoters. Up-regulated torpor-specific promoters (n = 226), which were  
4 CAGE clusters that were highly expressed exclusively during torpor, were at the  
5 intersection of the up-regulated reversible (n = 589) and hypometabolic promoters (n =  
6 330). Down-regulated torpor-specific promoters (n = 61), which were CAGE clusters that  
7 were highly suppressed exclusively during torpor, were at the intersection of down-  
8 regulated reversible (n = 277) and hypometabolic promoters (n = 137).

9 (B) (C) Top five up-regulated (B) and down-regulated (C) torpor-specific promoters ordered  
10 according to the sum of the TPM change observed in the reversibility and hypometabolism  
11 experiments. Only promoters that had annotated downstream genes are shown.

12 (D) Top ten enriched KEGG pathways in the torpor-specific promoters.

13 (E) Distribution of the SI of all of the mouse muscle promoters. An SI of 2 indicates a  
14 singleton-shaped CAGE TSS signal, and promoters with  $SI < -1$  have a broad shape.

15 (F) Distribution of the SI for torpor-specific promoters compared to all muscle promoters.  
16 The three horizontal lines inside the violin denote the 1st, 2nd, and 3rd quartile of the  
17 distribution from the upmost line.

18 (G) Distribution of CAGE clusters according to the mean TPM and the fold-change TPM of  
19 the Mid to Dep group. Top five up- and down-regulated torpor-deprivation-specific  
20 promoters that had annotated downstream genes are shown.

21 (H) Among the torpor-specific up-regulated genes, *Atf3* was the only DE gene during torpor  
22 deprivation.

23 (I) Enrichment profile of the ATF3-binding motif in torpor-specific promoter regions.

24

1 **Figure 5. Genetic Link of Distinct Torpor Phenotypes in Inbred Mice.**

2 (A) Enrichment study of the B6J/B6N SNPs in torpor-specific promoter enriched KEGG  
3 pathways.

4 (B) SNP counts in SNP-positive promoters (left). No group showed a significant enrichment  
5 by B6J/B6N SNPs (right). Rev, Hypo, and Torpor denote reversible, hypometabolic, and  
6 torpor-specific promoters.

7 (C) SNP density was estimated in each promoter group. Light blue dashed line denotes the  
8 background SNP density.

## 1 REFERENCES

- 2 Abnous, K., and Storey, K.B. (2008). Skeletal muscle hexokinase: Regulation in  
3 mammalian hibernation. *Mol. Cell. Biochem.* 319, 41–50.
- 4 Alvarado, S., Mak, T., Liu, S., Storey, K.B., and Szyf, M. (2015). Dynamic changes in global  
5 and gene-specific DNA methylation during hibernation in adult thirteen-lined ground  
6 squirrels, *Ictidomys tridecemlineatus*. *J. Exp. Biol.* 218, 1787–1795.
- 7 Arnaud, O., Kato, S., Poulain, S., and Plessy, C. (2016). Targeted reduction of highly  
8 abundant transcripts using pseudo-random primers. *Biotechniques* 60, 169–174.
- 9 Avior, Y., Sagi, I., and Benvenisty, N. (2016). Pluripotent stem cells in disease modelling  
10 and drug discovery. *Nat. Rev. Mol. Cell Biol.* 17, 170–182.
- 11 Biggar, Y., and Storey, K.B. (2014). Global DNA modifications suppress transcription in  
12 brown adipose tissue during hibernation. *Cryobiology*.
- 13 Bogren, L.K., Grabek, K.R., Barsh, G.S., and Martin, S.L. (2017). Comparative tissue  
14 transcriptomics highlights dynamic differences among tissues but conserved metabolic  
15 transcript prioritization in preparation for arousal from torpor. *J. Comp. Physiol. B Biochem.*  
16 *Syst. Environ. Physiol.* 187, 735–748.
- 17 Bouma, H.R., Verhaag, E.M., Otis, J.P., Heldmaier, G., Swoap, S.J., Strijkstra, A.M.,  
18 Henning, R.H., and Carey, H. V. (2012). Induction of torpor: Mimicking natural metabolic  
19 suppression for biomedical applications. *J. Cell. Physiol.* 227, 1285–1290.
- 20 Cai, D., McCarron, R.M., Yu, E.Z., Li, Y., and Hallenbeck, J. (2004). Akt phosphorylation  
21 and kinase activity are down-regulated during hibernation in the 13-lined ground squirrel.  
22 *Brain Res.* 1014, 14–21.
- 23 Chen, M., Zhang, X., Liu, J., and Storey, K.B. (2013). High-Throughput Sequencing  
24 Reveals Differential Expression of miRNAs in Intestine from Sea Cucumber during  
25 Aestivation. *PLoS One* 8, 1–8.
- 26 Dikic, D., Heldmaier, G., and Meyer, C.W. (2008). Induced torpor in different strains of  
27 laboratory mice. *Hypometabolism Anim.* 223–229.
- 28 Epperson, L.E., Dahl, T. a, and Martin, S.L. (2004). Quantitative analysis of liver protein  
29 expression during hibernation in the golden-mantled ground squirrel. *Mol. Cell. Proteomics*



1 3, 920–933.

2 Fedorov, V.B., Goropashnaya, A. V., Tøien, Ø., Stewart, N.C., Gracey, A.Y., Chang, C.,  
3 Qin, S., Pertea, G., Quackenbush, J., Showe, L.C., et al. (2009). Elevated expression of  
4 protein biosynthesis genes in liver and muscle of hibernating black bears ( *Ursus*  
5 *americanus* ). *Physiol. Genomics* 37, 108–118.

6 Fedorov, V.B., Goropashnaya, A. V., Stewart, N.C., Tøien, Ø., Chang, C., Wang, H., Yan,  
7 J., Showe, L.C., Showe, M.K., and Barnes, B.M. (2014). Comparative functional genomics  
8 of adaptation to muscular disuse in hibernating mammals. *Mol. Ecol.* 23, 5524–5537.

9 Forrest, A.R.R., Kawaji, H., Rehli, M., Baillie, J.K., De Hoon, M.J.L., Haberle, V., Lassmann,  
10 T., Kulakovskiy, I. V., Lizio, M., Itoh, M., et al. (2014). A promoter-level mammalian  
11 expression atlas. *Nature* 507, 462–470.

12 Franken, P., Malafosse, a, and Tafti, M. (1998). Genetic variation in EEG activity during  
13 sleep in inbred mice. *Am. J. Physiol.* 275, R1127-37.

14 Geiser, F. (2004). Metabolic Rate and Body Temperature Reduction During Hibernation  
15 and Daily Torpor. *Annu. Rev. Physiol.* 66, 239–274.

16 Hai, T., and Hartman, M.G. (2001). The molecular biology and nomenclature of the  
17 activating transcription factor/cAMP responsive element binding family of transcription  
18 factors: Activating transcription factor proteins and homeostasis. *Gene* 273, 1–11.

19 Hampton, M., Melvin, R.G.R., Kendall, A.H., Kirkpatrick, B.R., Peterson, N., Andrews,  
20 M.T.M., Andrews, M.T.M., Carey, H., Andrews, M.T.M., Martin, S., et al. (2011). Deep  
21 sequencing the transcriptome reveals seasonal adaptive mechanisms in a hibernating  
22 mammal. *PLoS One* 6, e27021.

23 Han, Y., Zheng, G., Yang, T., Zhang, S., Dong, D., and Pan, Y.-H. (2015). Adaptation of  
24 peroxisome proliferator-activated receptor alpha to hibernation in bats. *BMC Evol. Biol.* 15,  
25 88.

26 Heldmaier, G., Ortmann, S., and Elvert, R. (2004). Natural hypometabolism during  
27 hibernation and daily torpor in mammals. *Respir. Physiol. Neurobiol.* 141, 317–329.

28 Hindle, A., and Karimpour-Fard, A. (2011). Skeletal muscle proteomics: carbohydrate  
29 metabolism oscillates with seasonal and torpor-arousal physiology of hibernation. *Am. J.*

- 1 Horman, S., Hussain, N., Dilworth, S.M., Storey, K.B., and Rider, M.H. (2005). Evaluation of  
2 the role of AMP-activated protein kinase and its downstream targets in mammalian  
3 hibernation. *Comp. Biochem. Physiol. - B Biochem. Mol. Biol.* *142*, 374–382.
- 4 Hoskins, R. a, Landolin, J.M., Brown, J.B., Sandler, J.E., Takahashi, H., Lassmann, T., Yu,  
5 C., Booth, B.W., Zhang, D., Wan, K.H., et al. (2011). Genome-wide analysis of promoter  
6 architecture in *Drosophila melanogaster*. *Genome Res* *21*, 182–192.
- 7 Hudson, J., and Scott, I. (1979). Daily torpor in the laboratory mouse, *Mus musculus* var.  
8 albino. *Physiol. Zool.* *52*, 205–218.
- 9 Ikeno, T., Williams, C.T., Buck, C.L., Barnes, B.M., and Yan, L. (2017). Clock Gene  
10 Expression in the Suprachiasmatic Nucleus of Hibernating Arctic Ground Squirrels. *J. Biol.*  
11 *Rhythms* *32*, 246–256.
- 12 Jansen, H.T., Leise, T., Stenhouse, G., Pigeon, K., Kasworm, W., Teisberg, J., Radandt, T.,  
13 Dallmann, R., Brown, S., and Robbins, C.T. (2016). The bear circadian clock doesn't  
14 "sleep" during winter dormancy. *Front. Zool.* *13*.
- 15 Kanamori-Katayama, M., Itoh, M., Kawaji, H., Lassmann, T., Katayama, S., Kojima, M.,  
16 Bertin, N., Kaiho, A., Ninomiya, N., Daub, C.O., et al. (2011). Unamplified cap analysis of  
17 gene expression on a single-molecule sequencer. *Genome Res.* *21*, 1150–1159.
- 18 Keane, T.M., Goodstadt, L., Danecek, P., White, M.A., Wong, K., Yalcin, B., Heger, A.,  
19 Agam, A., Slater, G., Goodson, M., et al. (2011). Mouse genomic variation and its effect on  
20 phenotypes and gene regulation. *Nature* *477*, 289–294.
- 21 Khan, A., Fornes, O., Stigliani, A., Gheorghe, M., Castro-Mondragon, J.A., Van Der Lee, R.,  
22 Bessy, A., Chèneby, J., Kulkarni, S.R., Tan, G., et al. (2018). JASPAR 2018: Update of the  
23 open-access database of transcription factor binding profiles and its web framework.  
24 *Nucleic Acids Res.* *46*, D260–D266.
- 25 Kim, D., Langmead, B., and Salzberg, S.L. (2015). HISAT: a fast spliced aligner with low  
26 memory requirements. *Nat. Methods* *12*, 357–360.
- 27 Kodzius, R., Kojima, M., Nishiyori, H., Nakamura, M., Fukuda, S., Tagami, M., Sasaki, D.,  
28 Imamura, K., Kai, C., Harbers, M., et al. (2006). CAGE: cap analysis of gene expression.  
29 *Nat. Methods* *3*, 211–222.

- 1 Koehl, M., Battle, S.E., and Turek, F.W. (2003). Sleep in female mice: a strain comparison  
2 across the estrous cycle. *Sleep* 26, 267–272.
- 3 Kopp, C. (2001). Locomotor activity rhythm in inbred strains of mice: implications for  
4 behavioural studies. *Behav. Brain Res.* 125, 93–96.
- 5 Kumar, V., Kim, K., Joseph, C., Kourrich, S., Yoo, S.-H., Huang, H.C., Vitaterna, M.H., de  
6 Villena, F.P.-M., Churchill, G., Bonci, A., et al. (2013). C57BL/6N mutation in cytoplasmic  
7 FMRP interacting protein 2 regulates cocaine response. *Science* (80-. ). 342, 1508–1512.
- 8 Lanaspá, M.A., Epperson, L.E., Li, N., Cicerchi, C., Garcia, G.E., Roncal-Jimenez, C.A.,  
9 Trostel, J., Jain, S., Mant, C.T., Rivard, C.J., et al. (2015). Opposing activity changes in  
10 AMP deaminase and AMP-activated protein kinase in the hibernating ground squirrel. *PLoS*  
11 *One* 10, 1–19.
- 12 Lee, K., So, H., Gwag, T., Ju, H., Lee, J.W., Yamashita, M., and Choi, I. (2010). Molecular  
13 mechanism underlying muscle mass retention in hibernating bats: Role of periodic arousal.  
14 *J. Cell. Physiol.* 222, 313–319.
- 15 Lee, Y.S., Sasaki, T., Kobayashi, M., Kikuchi, O., Kim, H.J., Yokota-Hashimoto, H.,  
16 Shimpuku, M., Susanti, V.Y., Ido-Kitamura, Y., Kimura, K., et al. (2013). Hypothalamic  
17 ATF3 is involved in regulating glucose and energy metabolism in mice. *Diabetologia* 56,  
18 1383–1393.
- 19 Lei, M., Dong, D., Mu, S., Pan, Y.H., and Zhang, S. (2014). Comparison of brain  
20 transcriptome of the greater horseshoe bats (*Rhinolophus ferrumequinum*) in active and  
21 torpid episodes. *PLoS One* 9, e107746.
- 22 Li, H., and Durbin, R. (2010). Fast and accurate long-read alignment with Burrows-Wheeler  
23 transform. *Bioinformatics*.
- 24 Lizio, M., Deviatiiarov, R., Nagai, H., Galan, L., Arner, E., Itoh, M., Lassmann, T.,  
25 Kasukawa, T., Hasegawa, A., Ros, M.A., et al. (2017). Systematic analysis of transcription  
26 start sites in avian development. *PLoS Biol.* 15, e2002887.
- 27 Luu, B.E., Biggar, K.K., Wu, C.W., and Storey, K.B. (2016). Torpor-responsive expression  
28 of novel microRNA regulating metabolism and other cellular pathways in the thirteen-lined  
29 ground squirrel, *Ictidomys tridecemlineatus*. *FEBS Lett.* 590, 3574–3582.

- 1 Martin, S.L., Epperson, L.E., Rose, J.C., Kurtz, C.C., Ané, C., and Carey, H. V. (2008).  
2 Proteomic analysis of the winter-protected phenotype of hibernating ground squirrel  
3 intestine. *Am. J. Physiol. Regul. Integr. Comp. Physiol.* 295, R316-28.
- 4 McMullen, D.C., and Hallenbeck, J.M. (2010). Regulation of Akt during torpor in the  
5 hibernating ground squirrel, *Ictidomys tridecemlineatus*. *J. Comp. Physiol. B Biochem. Syst.*  
6 *Environ. Physiol.* 180, 927–934.
- 7 Melvin, R.G., and Andrews, M.T. (2009). Torpor induction in mammals: recent discoveries  
8 fueling new ideas. *Trends Endocrinol. Metab.* 20, 490–498.
- 9 Mochida, K., Hasegawa, A., Otaka, N., Hama, D., Furuya, T., Yamaguchi, M., Ichikawa, E.,  
10 Ijuin, M., Taguma, K., Hashimoto, M., et al. (2014). Devising Assisted Reproductive  
11 Technologies for Wild-Derived Strains of Mice: 37 Strains from Five Subspecies of *Mus*  
12 *musculus*. *PLoS One* 9, e114305.
- 13 Muleme, H.M., Walpole, A.C., and Staples, J.F. (2006). Mitochondrial metabolism in  
14 hibernation: metabolic suppression, temperature effects, and substrate preferences.  
15 *Physiol. Biochem. Zool.* 79, 474–483.
- 16 Murata, M., Nishiyori-Sueki, H., Kojima-Ishiyama, M., Carninci, P., Hayashizaki, Y., and  
17 Itoh, M. (2014). Detecting Expressed Genes Using CAGE. In *Methods in Molecular Biology*  
18 (Clifton, N.J.), pp. 67–85.
- 19 Nakamura, K. (2011). Central circuitries for body temperature regulation and fever.
- 20 Raborn, R.T., Spitze, K., Brendel, V.P., and Lynch, M. (2016). Promoter architecture and  
21 sex-specific gene expression in *Daphnia pulex*. *Genetics*.
- 22 Rao, J., Qian, X., Li, G., Pan, X., Zhang, C., Zhang, F., Zhai, Y., Wang, X., and Lu, L.  
23 (2015). ATF3-mediated NRF2/HO-1 signaling regulates TLR4 innate immune responses in  
24 mouse liver ischemia/reperfusion injury. *Am. J. Transplant.* 15, 76–87.
- 25 Revel, F.G., Herwig, A., Garidou, M.-L., Dardente, H., Menet, J.S., Masson-Pévet, M.,  
26 Simonneaux, V., Saboureau, M., and Pévet, P. (2007). The circadian clock stops ticking  
27 during deep hibernation in the European hamster. *Proc. Natl. Acad. Sci. U. S. A.* 104,  
28 13816–13820.
- 29 Ruf, T., and Geiser, F. (2015). Daily torpor and hibernation in birds and mammals. *Biol.*

- 1 Rev. 90, 891–926.
- 2 Ruth, J.A., Ullman, E.A., and Collins, A.C. (1988). An analysis of cocaine effects on  
3 locomotor activities and heart rate in four inbred mouse strains. *Pharmacol. Biochem.*  
4 *Behav.* 29, 157–162.
- 5 Sandri, M., Sandri, C., Gilbert, A., Skurk, C., and Calabria, E. (2004). Foxo Transcription  
6 Factors Induce the Atrophy- Related Ubiquitin Ligase Atrogin-1 and Cause Skeletal Muscle  
7 Atrophy. *Cell* 117, 1–2.
- 8 Schwartz, W.J., and Zimmerman, P. (1990). Circadian timekeeping in BALB/c and C57BL/6  
9 inbred mouse strains. *J. Neurosci.* 10, 3685–3694.
- 10 Schwartz, C., Hampton, M., and Andrews, M.T. (2013). Seasonal and regional differences  
11 in gene expression in the brain of a hibernating mammal. *PLoS One* 8, e58427.
- 12 Seim, I., Fang, X., Xiong, Z., Lobanov, A. V., Huang, Z., Ma, S., Feng, Y., Turanov, A.A.,  
13 Zhu, Y., Lenz, T.L., et al. (2013). Genome analysis reveals insights into physiology and  
14 longevity of the Brandt’s bat *Myotis brandtii*. *Nat. Commun.* 4, 1–8.
- 15 Senf, S.M., Dodd, S.L., and Judge, A.R. (2010). FOXO signaling is required for disuse  
16 muscle atrophy and is directly regulated by Hsp70. *AJP Cell Physiol.* 298, C38–C45.
- 17 Shao, C., Liu, Y., Ruan, H., Li, Y., Wang, H., and Kohl, F. (2010). Shotgun proteomics  
18 analysis of hibernating arctic ground squirrels. *Cell. Proteomics.*
- 19 Simon, M.M., Greenaway, S., White, J.K., Fuchs, H., Gailus-Durner, V., Wells, S., Sorg, T.,  
20 Wong, K., Bedu, E., Cartwright, E.J., et al. (2013). A comparative phenotypic and genomic  
21 analysis of C57BL/6J and C57BL/6N mouse strains. *Genome Biol.* 14, R82.
- 22 Srere, H.K., Belke, D., Wang, L.C., and Martin, S.L. (1995). alpha 2-Macroglobulin gene  
23 expression during hibernation in ground squirrels is independent of acute phase response.  
24 *Am. J. Physiol.* 268, R1507–R1512.
- 25 Sunagawa, G.A., and Takahashi, M. (2016). Hypometabolism during Daily Torpor in Mice is  
26 Dominated by Reduction in the Sensitivity of the Thermoregulatory System. *Sci. Rep.* 6,  
27 37011.
- 28 Sunagawa, G.A., Sumiyama, K., Ukai-Tadenuma, M., Perrin, D., Fujishima, H., Ukai, H.,  
29 Nishimura, O., Shi, S., Ohno, R., Narumi, R., et al. (2016). Mammalian Reverse Genetics

- 1 without Crossing Reveals Nr3a as a Short-Sleeper Gene. *Cell Rep.* *14*, 662–677.
- 2 Tahara, Y., and Shibata, S. (2013). Chronobiology and nutrition. *Neuroscience* *253*, 78–88.
- 3 Tatsuki, F., Sunagawa, G.A., Shi, S., Susaki, E.A., Yukinaga, H., Perrin, D., Sumiyama, K.,  
4 Ukai-Tadenuma, M., Fujishima, H., Ohno, R., et al. (2016). Involvement of Ca<sup>2+</sup> -  
5 Dependent Hyperpolarization in Sleep Duration in Mammals. *Neuron* *90*, 70–85.
- 6 Tessier, S.N., Zhang, J., Biggar, K.K., Wu, C.W., Pifferi, F., Perret, M., and Storey, K.B.  
7 (2015). Regulation of the PI3K/AKT Pathway and Fuel Utilization During Primate Torpor in  
8 the Gray Mouse Lemur, *Microcebus murinus*. *Genomics, Proteomics Bioinforma.* *13*, 91–  
9 102.
- 10 Wang, H., Yang, H., Shivalila, C.S., Dawlaty, M.M., Cheng, A.W., Zhang, F., and Jaenisch,  
11 R. (2013). One-step generation of mice carrying mutations in multiple genes by  
12 CRISPR/Cas-mediated genome engineering. *Cell* *153*, 910–918.
- 13 Wang, Z., Ma, J., Miyoshi, C., Li, Y., Sato, M., Ogawa, Y., Lou, T., Ma, C., Gao, X., Lee, C.,  
14 et al. (2018). Quantitative phosphoproteomic analysis of the molecular substrates of sleep  
15 need. *Nature* *558*, 435–439.
- 16 Williams, D.R., Epperson, L.E., Li, W., Hughes, M.A., Taylor, R., Rogers, J., Martin, S.L.,  
17 Cossins, A.R., and Gracey, A.Y. (2005). Seasonally hibernating phenotype assessed  
18 through transcript screening. *Physiol. Genomics* *24*, 13–22.
- 19 Wu, C.-W., and Storey, K.B. (2012). Regulation of the mTOR signaling network in  
20 hibernating thirteen-lined ground squirrels. *J. Exp. Biol.* *215*, 1720–1727.
- 21 Xu, R., Andres-Mateos, E., Mejias, R., MacDonald, E.M., Leinwand, L.A., Merriman, D.K.,  
22 Fink, R.H.A., and Cohn, R.D. (2013a). Hibernating squirrel muscle activates the endurance  
23 exercise pathway despite prolonged immobilization. *Exp. Neurol.* *247*, 392–401.
- 24 Xu, Y., Shao, C., Fedorov, V.B., Goropashnaya, A. V., Barnes, B.M., and Yan, J. (2013b).  
25 Molecular signatures of mammalian hibernation: Comparisons with alternative phenotypes.  
26 *BMC Genomics* *14*.
- 27 Yoshida, T., Sugiura, H., Mitobe, M., Tsuchiya, K., Shiota, S., Nishimura, S., Shiohira, S.,  
28 Ito, H., Nobori, K., Gullans, S.R., et al. (2008). ATF3 Protects against Renal Ischemia-  
29 Reperfusion Injury. *J. Am. Soc. Nephrol.* *19*, 217–224.

- 1 Zhang, J., Tessier, S.N., Biggar, K.K., Wu, C.W., Pifferi, F., Perret, M., and Storey, K.B.
- 2 (2015). Regulation of Torpor in the Gray Mouse Lemur: Transcriptional and Translational
- 3 Controls and Role of AMPK Signaling. *Genomics, Proteomics Bioinforma.* *13*, 103–110.
- 4 Zhao, S., Shao, C., Goropashnaya, A. V, Stewart, N.C., Xu, Y., Toien, O., Barnes, B.M.,
- 5 Fedorov, V.B., and Yan, J. (2010). Genomic analysis of expressed sequence tags in
- 6 American black bear *Ursus americanus*. *BMC Genomics* *11*, 201.
- 7

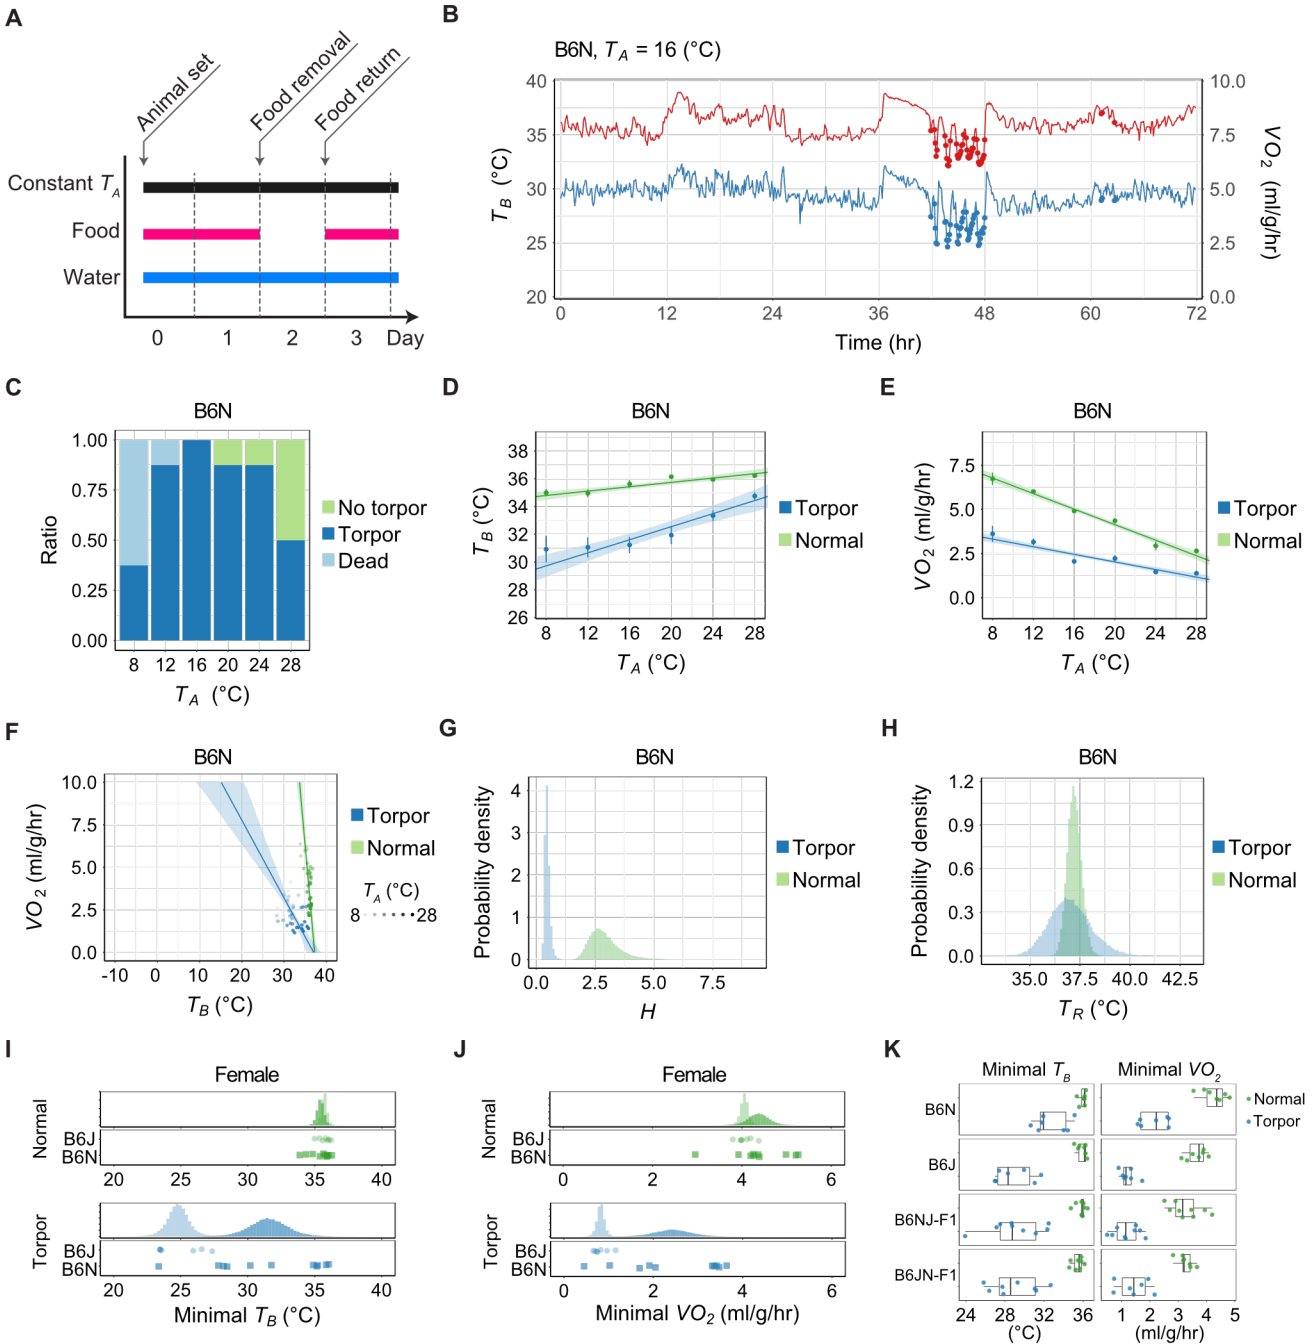

Sunagawa GA et al., Figure 1: Torpor Phenotype in Mice is Affected by Genetic Background.



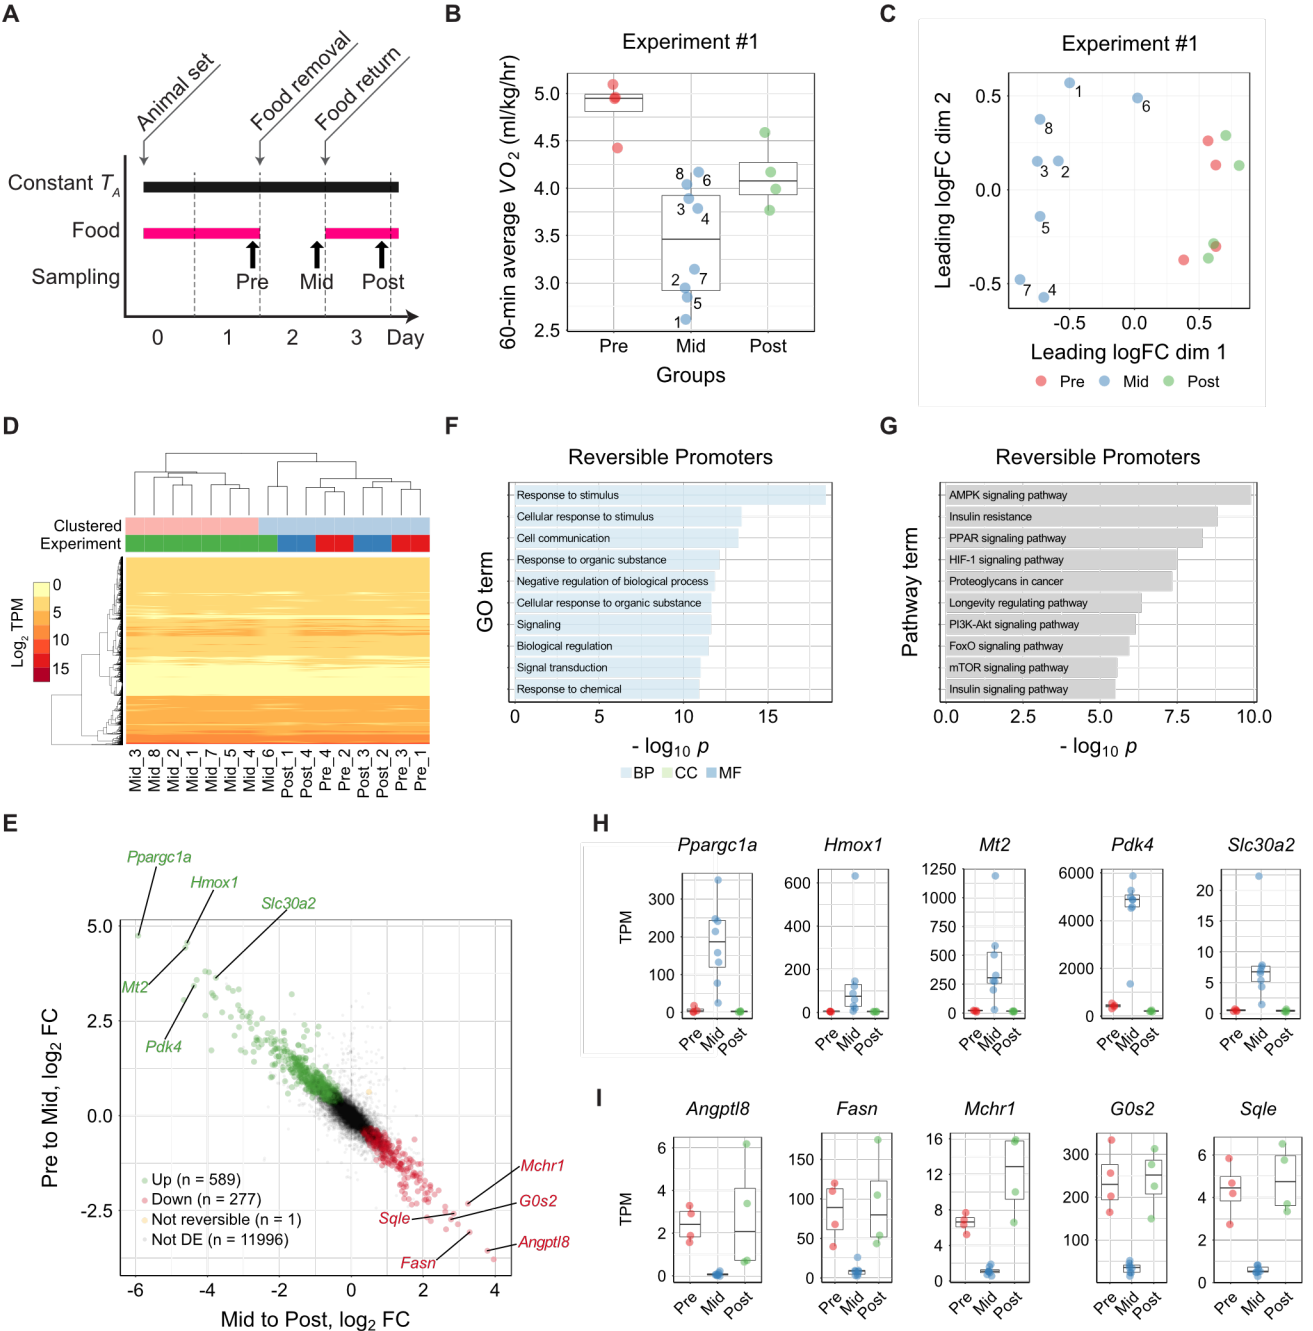

Sunagawa GA et al., Figure 2: Fasting-induced Torpor Shows a Reversible Transcriptome Signature.

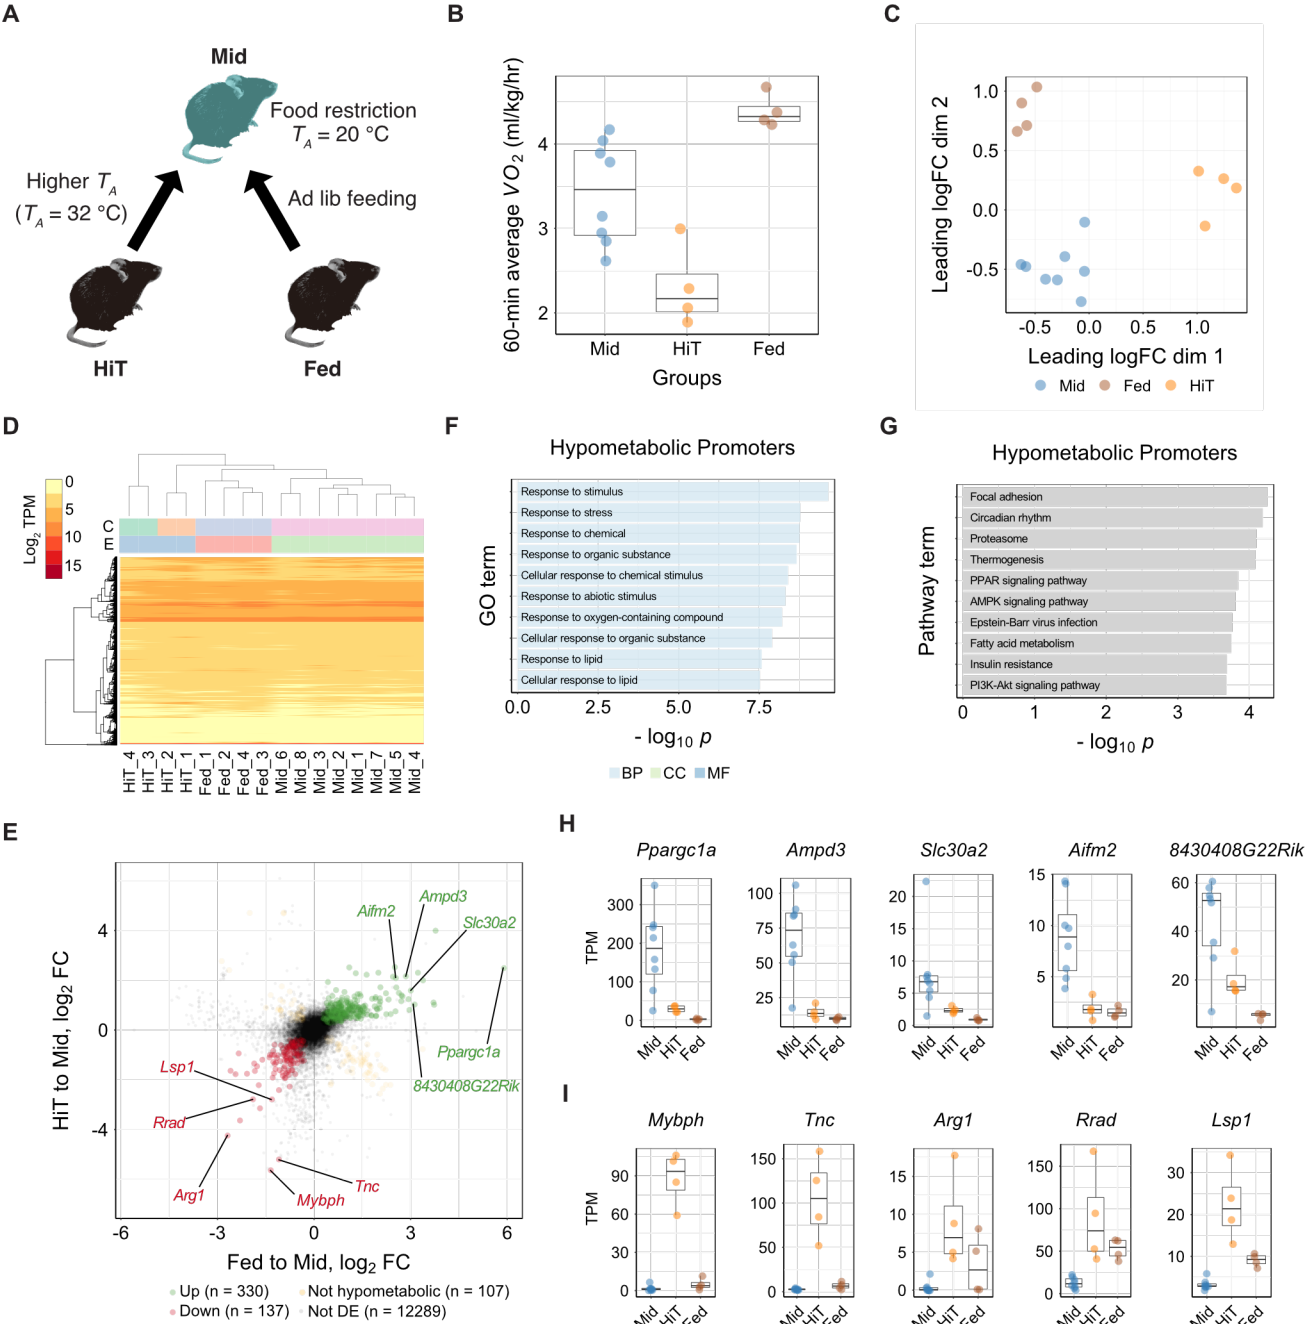

Sunagawa GA et al., Figure 3: Torpor Prevention at High  $T_A$  Revealed Hypometabolism-associated Promoters.

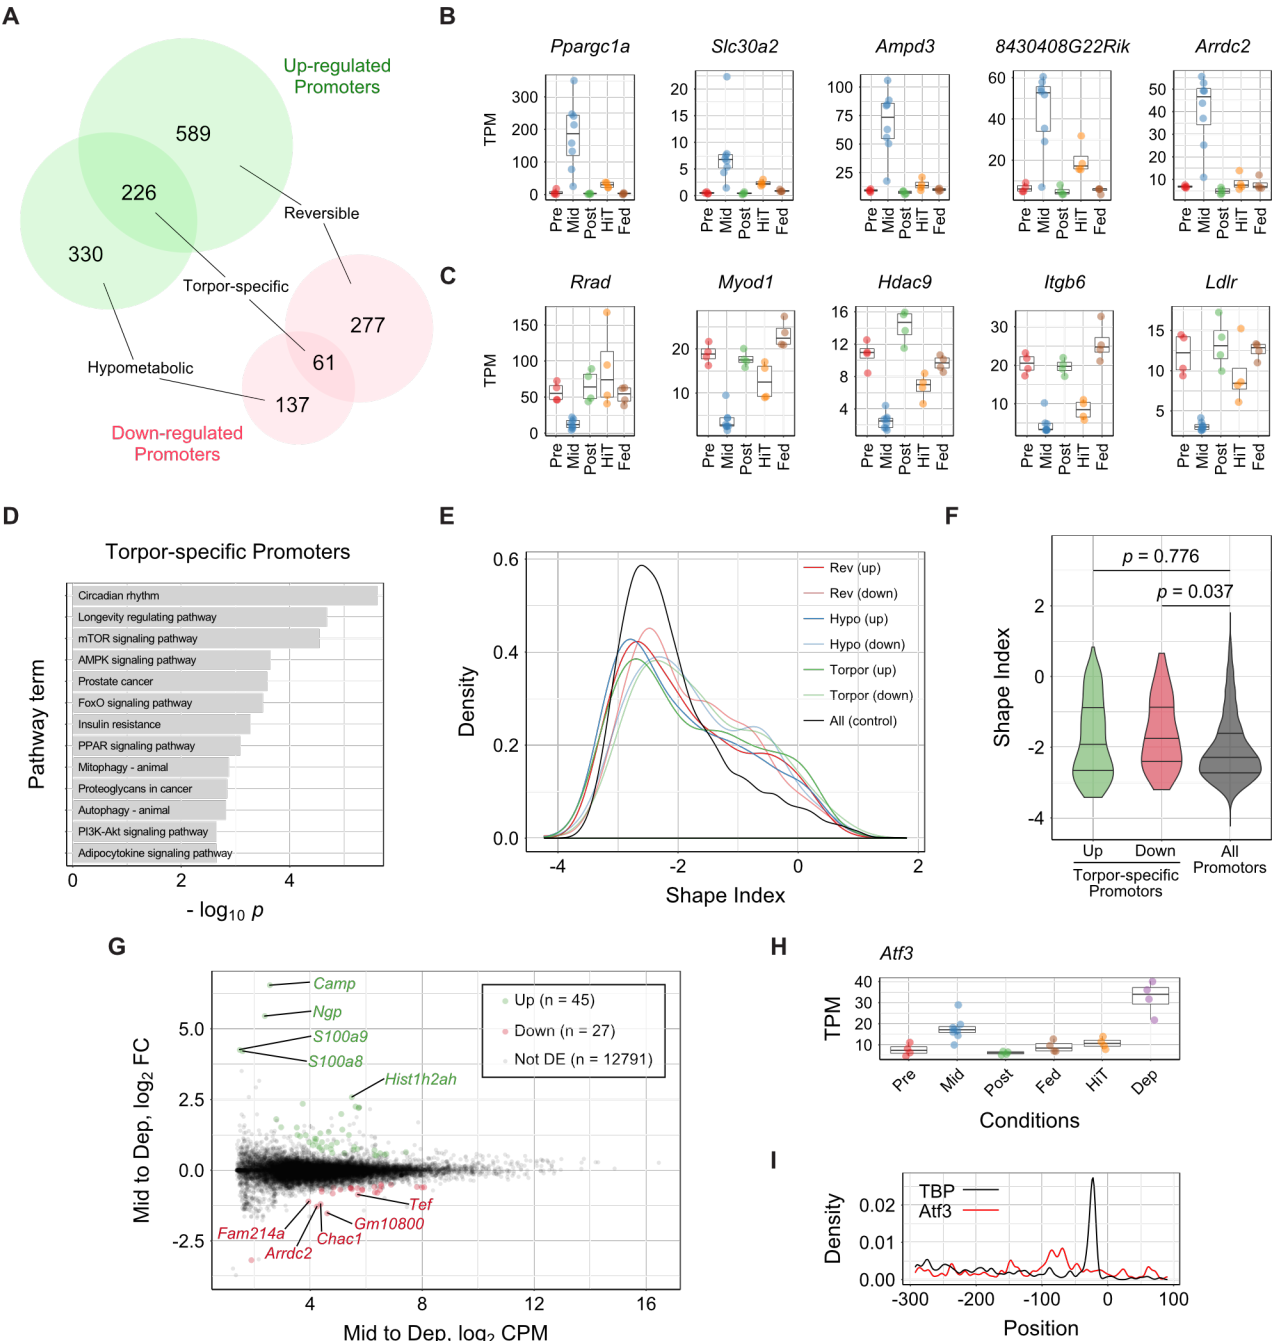

Sunagawa GA et al., Figure 4: Identification of Torpor-specific Promoters and their Dynamics.

**A**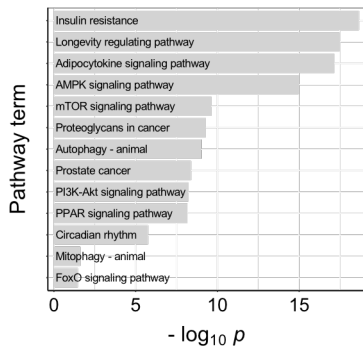**B**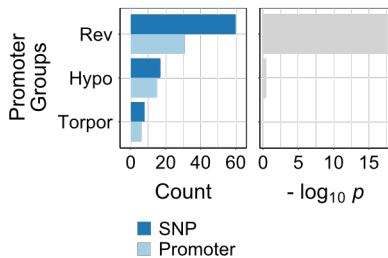**C**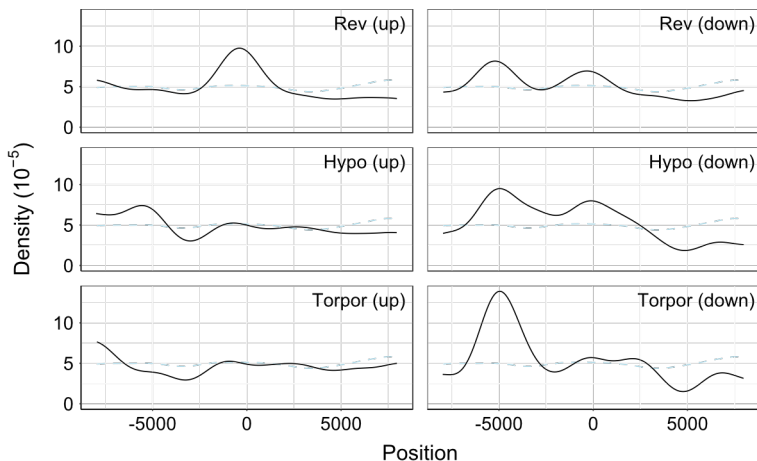

Sunagawa GA et al., Figure 5:  
**Genetic Link of Distinct Torpor Phenotypes in Inbred Mice.**

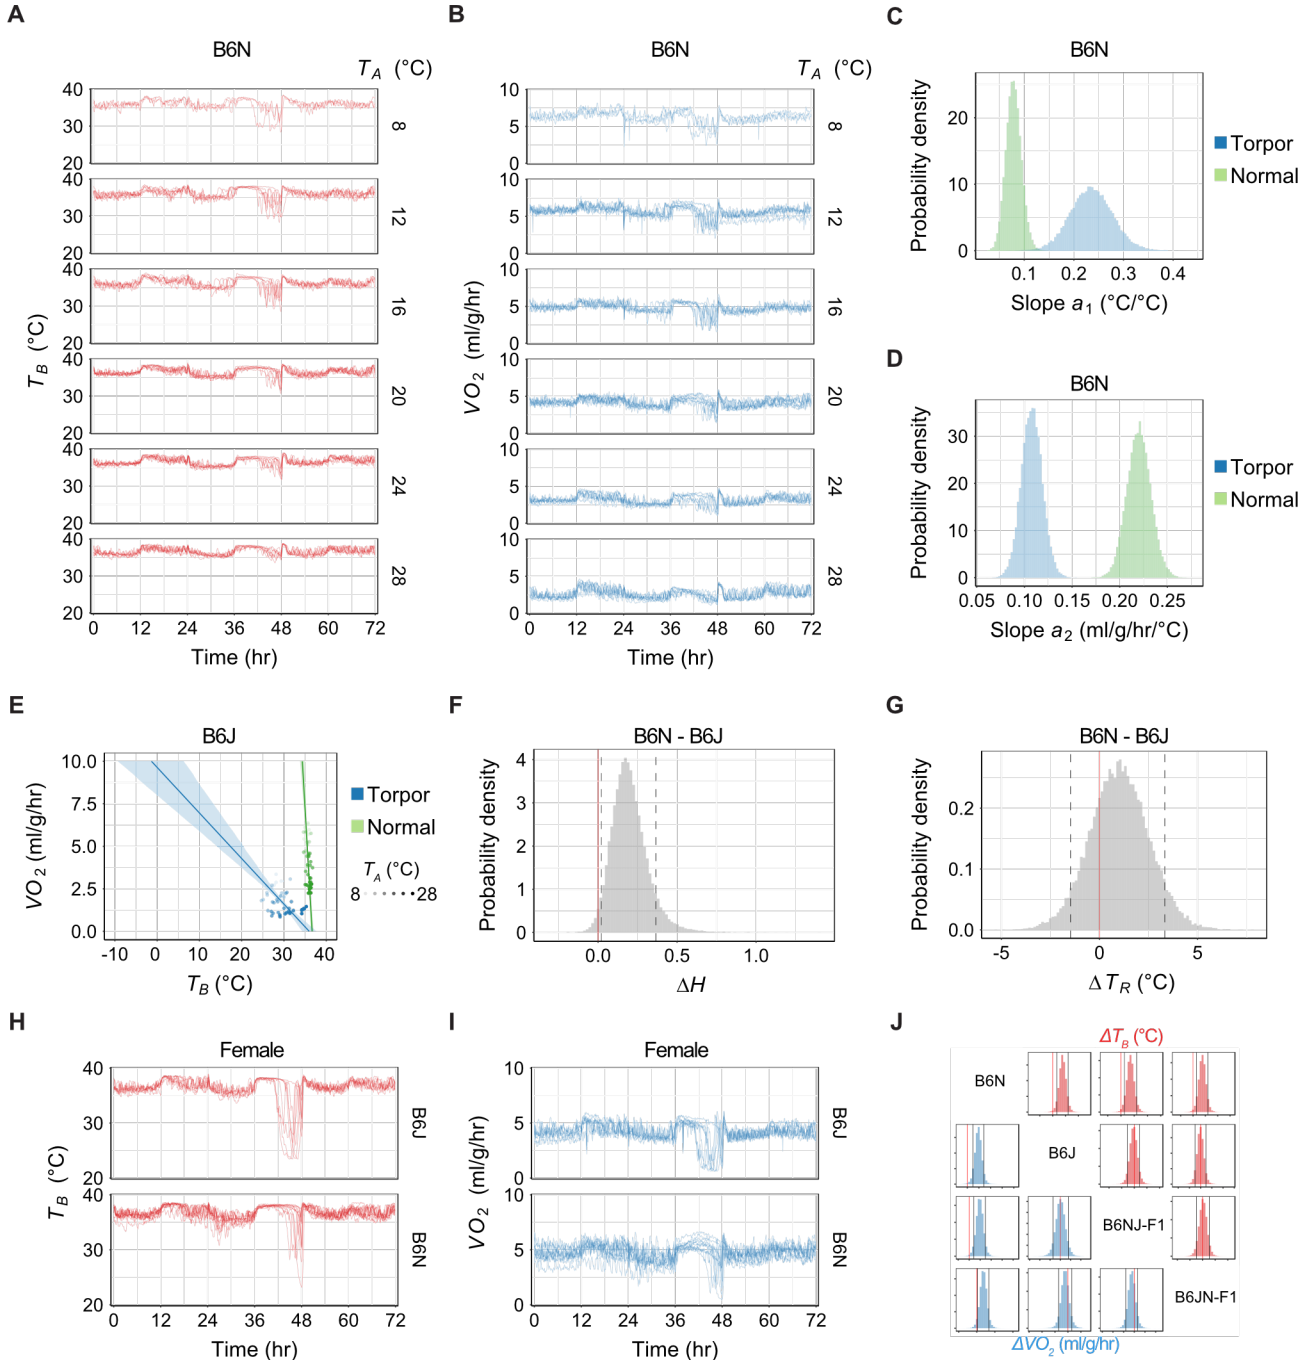

Sunagawa GA et al., Figure S1: Torpor Phenotype in Mice is Affected by Genetic Background, related to Figure 1.

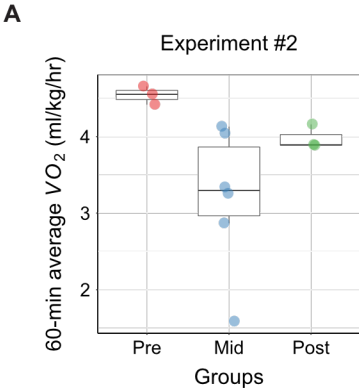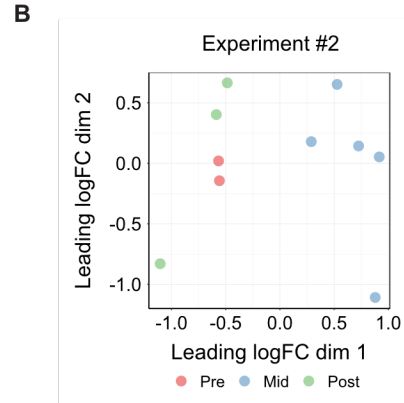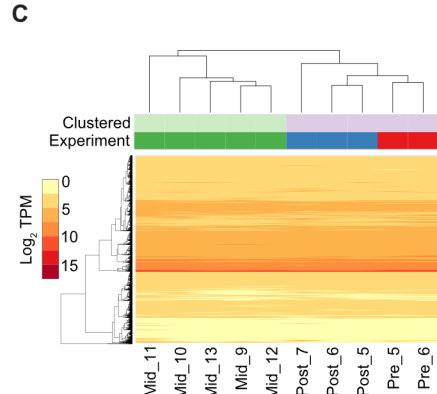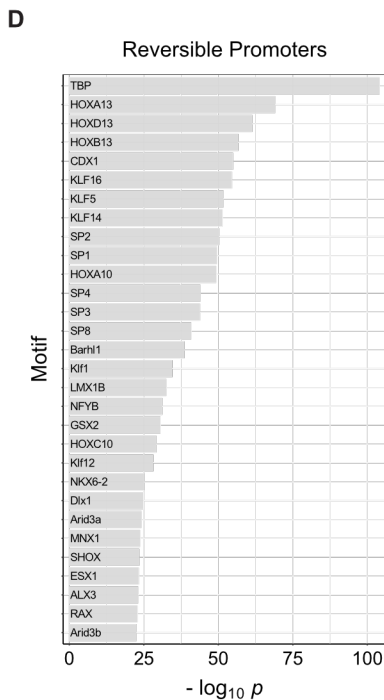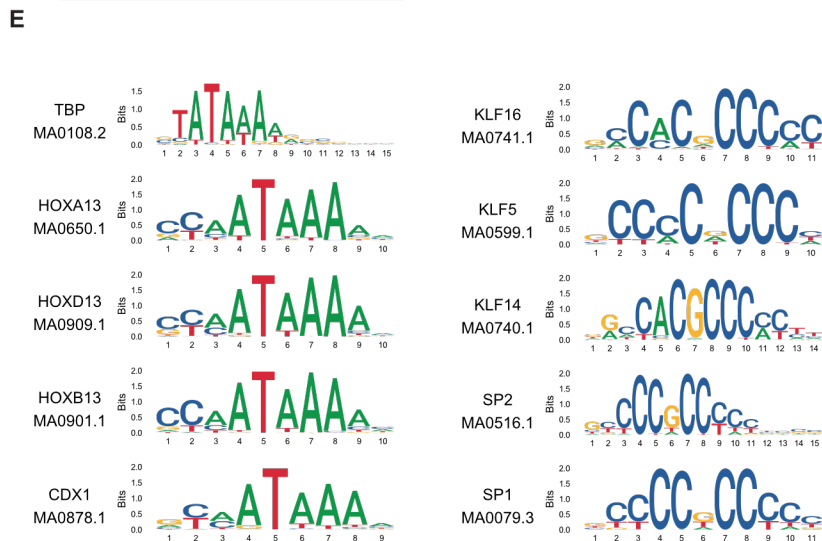

Sunagawa GA et al., Figure S2:  
Fasting-induced Torpor Shows a Reversible Transcriptome Signature, related to Figure 2

**A**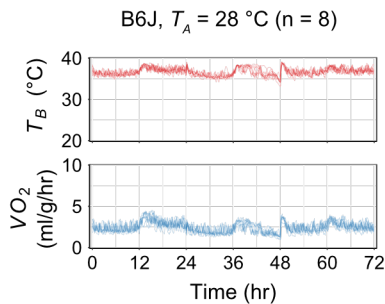**B**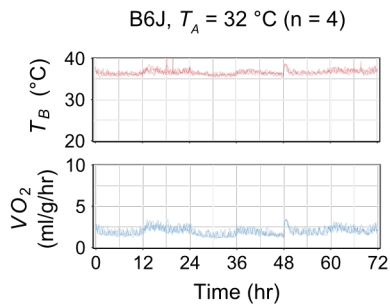**C**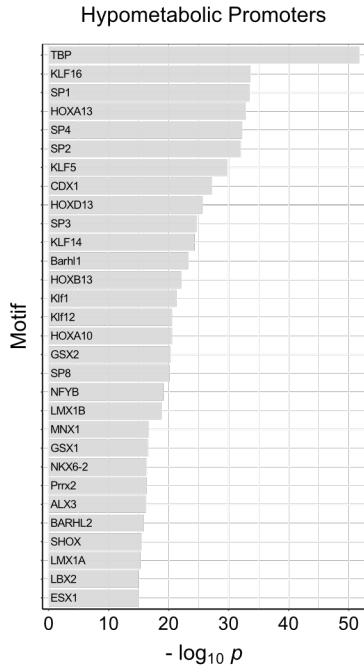**D**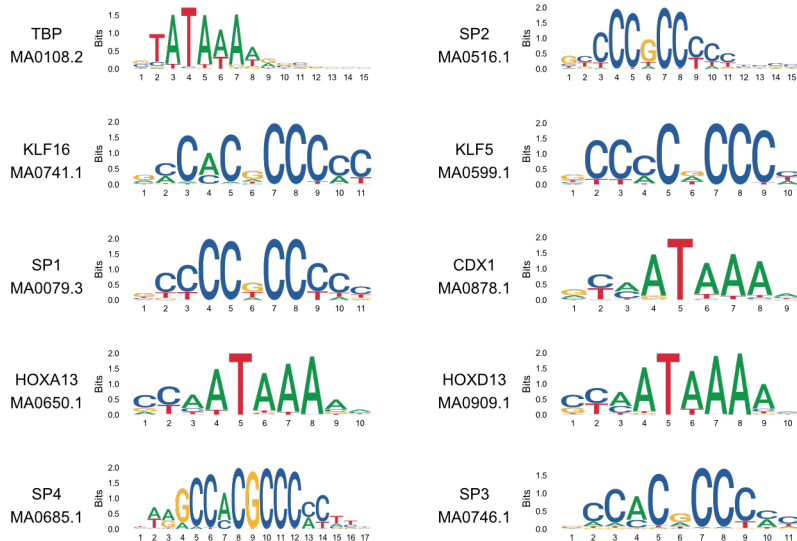

Sunagawa GA et al., Figure S3:

**Torpor Prevention at High  $T_A$  Revealed Hypometabolism-associated Promoters, related to Figure 3.**

A

## Torpor-specific Promoters

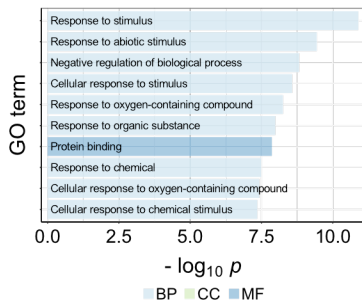

B

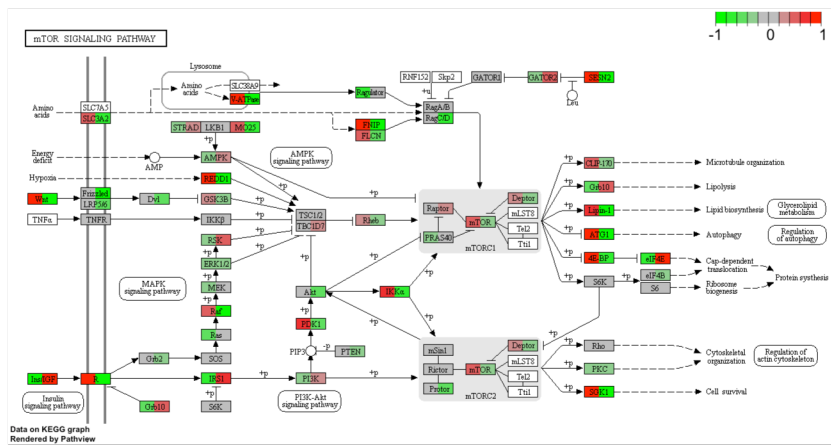

C

## Torpor-specific Promoters

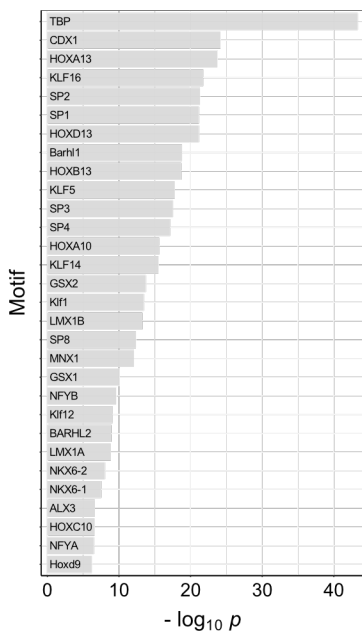

D

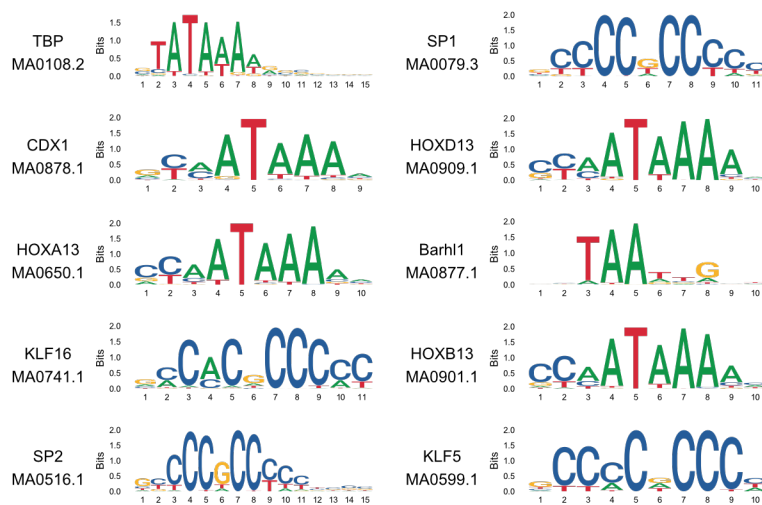

E

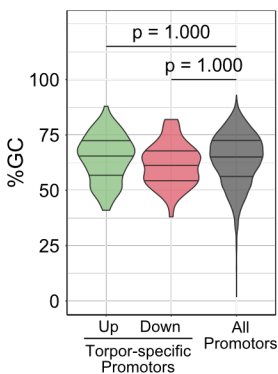

F

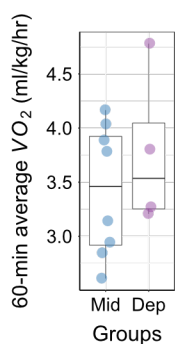

G

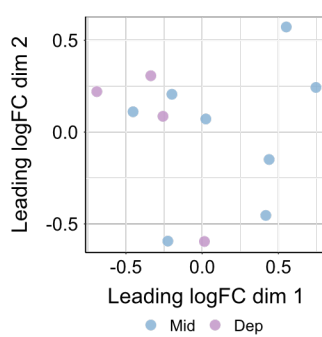

H

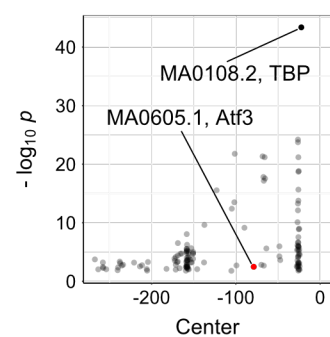

Sunagawa GA et al., Figure S4:

Identification of Torpor-specific Promoters and their Dynamics, related to Figure 4.



A

## Up-regulated Torpor-specific Promoters

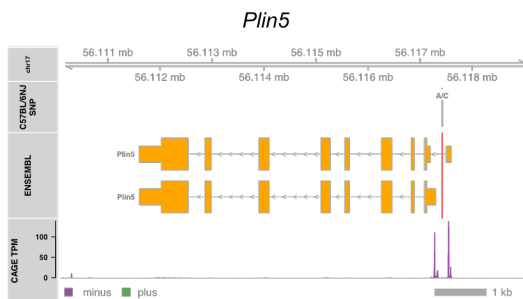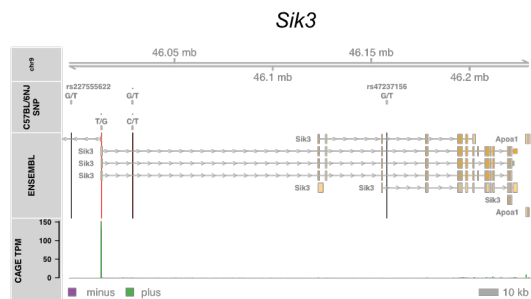

B

## Down-regulated Torpor-specific Promoters

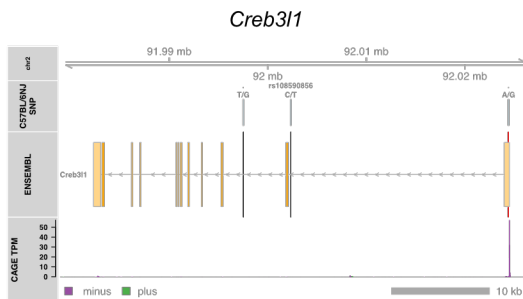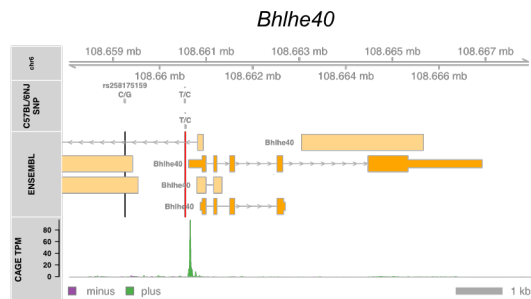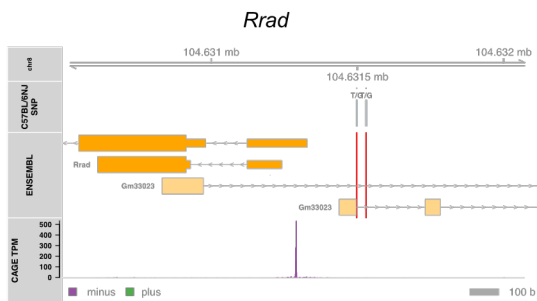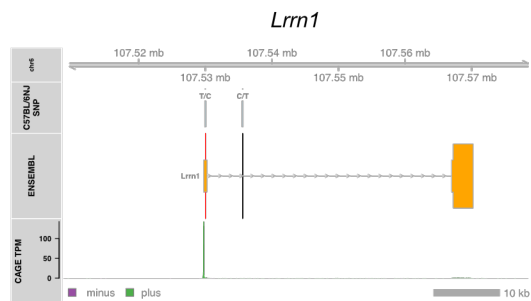

## 1 **SUPPLEMENTAL EXPERIMENTAL PROCEDURES**

### 2 **Animals**

3 For the C57BL/6NJcl mice, 58 total mice were used to characterize their torpor phenotype  
4 (12 females and 46 males). The age (mean  $\pm$  SD) and body weight (mean  $\pm$  SD) at the  
5 beginning of the experiment were as follows:  $8.67 \pm 0.39$  weeks old and  $19.6 \pm 0.7$  g for  
6 females;  $8.34 \pm 0.53$  weeks old and  $22.5 \pm 1.2$  g for males. For the C57BL/6J mice, 50 total  
7 mice were used to characterize the torpor phenotype ( $n = 12$ ; 8 females and 4 males) and  
8 sampling tissues ( $n = 38$ , all males). The characteristics were:  $8.43 \pm 0.15$  weeks old and  
9  $17.7 \pm 0.6$  g for females;  $8.22 \pm 0.39$  weeks old and  $23.0 \pm 1.2$  g for males. As described in  
10 the RESULTS section, for B6J mice, data recorded in a previous report ([Sunagawa and](#)  
11 [Takahashi, 2016](#)) ( $n = 43$ , all male mice,  $8.07 \pm 0.35$  weeks old,  $22.9 \pm 1.2$  g) were also  
12 included in the data analysis to characterize the thermoregulatory system. To test for torpor  
13 phenotype inheritance, B6J and B6N were crossed, and their offspring were evaluated.  
14 Male B6NJ mice (B6N females crossed with B6J males) and B6JN mice (B6J females  
15 crossed with B6N males) were used for this assessment. The characteristics of each strain  
16 were:  $n = 9$ ,  $8.90 \pm 1.01$  weeks old,  $25.5 \pm 2.9$  g for B6NJ-F1 mice and  $n = 8$ ,  $8.73 \pm 0.62$   
17 weeks old and  $23.3 \pm 0.9$  g for B6JN-F1 mice.

18 During the experiments, each animal was housed in a temperature-controlled  
19 chamber (HC-100, Shin Factory). To record  $T_B$  continuously, a telemetry temperature  
20 sensor (TA11TA-F10, DSI) was implanted in the animal's abdominal cavity under general  
21 inhalation anesthesia at least 7 days before recording. The metabolism of the animal was  
22 continuously analyzed by respiratory gas analysis (ARCO-2000 mass spectrometer, ARCO  
23 system). During the experiment, the animal was monitored through a networked video  
24 camera (TS-WPTCAM, I-O DATA, Inc.). This video camera can detect infrared signals,  
25 which made it possible to monitor the animal's health during the dark phase without  
26 opening the chamber.

27

### 28 **Daily Torpor Induction Experiment**

29 Each daily torpor induction experiment was designed to record the animal's metabolism for

1 three days ([Figure 1B](#)) unless the tissues were sampled on day 2. The animals were  
2 introduced to the chamber the day before recording started (day 0). Food and water were  
3 freely accessible. The  $T_A$  was set as indicated on day 0 and kept constant throughout the  
4 experiment. A telemetry temperature sensor implanted in the mouse was turned on before  
5 placing the mouse in the chamber. The standard experimental design was as follows: on  
6 day 2, ZT-0, the food was removed to induce torpor. After 24 hours, on day 3, ZT-0, the food  
7 was returned to each animal. In the torpor-prevention experiment with food administration  
8 ([Figure 3A](#)), the food was not removed at day 2. In the torpor-deprivation experiment, one  
9 experimenter monitored the  $VO_2$  and touched the mouse gently when the  $VO_2$  started to  
10 drop. The metabolism monitoring for torpor deprivation was started at ZT-17 on day 2 and  
11 maintained until the mouse tissue was sampled at ZT-22.

12

### 13 **Body Temperature and Oxygen Consumption Modelling for Daily Torpor Detection**

14 To model the temporal variation of  $T_B$  and  $VO_2$ , we constructed the models in a Bayesian  
15 framework. From the first 24-hour recordings of  $T_B$  and  $VO_2$  for each animal, we estimated  
16 the parameters using Markov Chain Monte Carlo (MCMC) sampling by Stan ([Stan](#)  
17 [Development Team, 2016a](#)) with the RStan library ([Stan Development Team, 2016b](#)) in R  
18 ([R Core Team, 2017](#)). The detailed methods were described previously ([Sunagawa and](#)  
19 [Takahashi, 2016](#)) and modified with software updates. In short, we used the 99.9% credible  
20 interval (CI) of the posterior distribution of the estimated metabolism, the  $T_B$  and  $VO_2$ , of the  
21 animal to detect outliers. That is, when the value was lower than the CI, that time point was  
22 defined as torpor due to an abnormally low metabolic status. In this study, when both  $T_B$   
23 and  $VO_2$  met the criteria in the second half of the day, the time point was labelled as torpor.

24

### 25 **Parameter Estimation of the Thermoregulatory system**

26 The thermoregulatory system was modelled as an integration of the heat loss and heat  
27 production of the animal. Three parameters  $G$ ,  $T_R$ , and  $H$  were estimated from the  
28 metabolic stable state of the animal at various  $T_{As}$ . The details were described previously  
29 ([Sunagawa and Takahashi, 2016](#)).

1

## 2 **Tissue Sampling and RNA Isolation**

3 Dissected soleus muscles were rapidly frozen in liquid nitrogen. The RNA was isolated  
4 using an RNeasy Fibrous tissue kit (Qiagen) according to the manufacturer's instructions.  
5 The quality of the total RNA was evaluated using a Bioanalyzer 2100 (Agilent). The quantity  
6 and purity of the RNA were estimated using a NanoDrop Spectrophotometer. The lateral or  
7 both soleus muscles were used according to the total amount of RNA needed.

8

## 9 **Data Processing**

10 Data were processed in R ([R Core Team, 2017](#)) unless otherwise noted. The expression  
11 level of the 12,862 defined CAGE clusters was normalized by sample in TPM (tags per  
12 million) and then analyzed with the edgeR package ([Robinson et al., 2010](#)) with TMM  
13 (trimmed mean of M-value) normalization. For MDS (multidimensional scaling) plots, DE  
14 (differential expression), and GO and KEGG pathway enrichment analysis, several R  
15 packages were applied, including edgeR, clusterProfiler ([Yu et al., 2012](#)), and pathview  
16 ([Luo and Brouwer, 2013](#)). Muscle enhancers were predicted de novo by applying the  
17 FANTOM5 protocol ([Andersson et al., 2014](#)) to our mouse CAGE data and masked with  
18  $\pm 500$ -bp regions from the 5' ends of annotated genes. The mouse CAGE data for muscles  
19 can be observed and are publicly available in the Zenbu browser  
20 (<http://fantom.gsc.riken.jp/zenbu/gLyphs/#config=yIDd70XVLdPufetrnXzQkB>). The DE  
21 results (reversible, hypometabolic, and torpor-deprivation-specific promoters) along with  
22 torpor-specific promoters are listed in [Supplemental Table S1](#).

23

## 24 **Basic Promoter Features Analysis**

25 Promoter region features were analyzed in terms of GC content and SI ([Hoskins et al.,](#)  
26 [2011](#)). The SI and %GC were calculated for  $\pm 50$  bp regions around the TSS position. CpG  
27 island muscle promoters were defined by searching for overlaps with the UCSC annotation  
28 using bedtools v2.25.

29

## 1 **Motif Analysis**

2 Transcription factor binding sites (TFBS) were predicted in -300/+100 bp regions around the  
3 TSS position using MEME Suite 4.11.2 and the JASPAR CORE motif library for vertebrates  
4 2016. The position-dependent enrichment of these motifs was performed by the CentriMo  
5 tool.

## 7 **SNP analysis**

8 The single nucleotide polymorphisms data for the C57BL/6NJ strain were downloaded from  
9 the Mouse Genomes Project of the Sanger Institute ([ftp://ftp-](ftp://ftp-mouse.sanger.ac.uk/current_snps/strain_specific_vcfs/C57BL_6NJ.mgp.v5.snps.dbSNP14)  
10 [mouse.sanger.ac.uk/current\\_snps/strain\\_specific\\_vcfs/C57BL\\_6NJ.mgp.v5.snps.dbSNP14](ftp://ftp-mouse.sanger.ac.uk/current_snps/strain_specific_vcfs/C57BL_6NJ.mgp.v5.snps.dbSNP14)  
11 [2.vcf.gz](ftp://ftp-mouse.sanger.ac.uk/current_snps/strain_specific_vcfs/C57BL_6NJ.mgp.v5.snps.dbSNP14)). Originated from the C57BL/6N strain, the C57BL/6NJ mice were derived from  
12 embryos cryopreserved (F126) at the NIH in 1984, and C57BL/6NJcl mice were introduced  
13 to the Central Institute for Experimental Animals from the NIH at F121 in 1978, and then  
14 transferred to CLEA Japan at F146 in 1988. Of the C57BL/6NJ-specific SNPs, 89% are  
15 preserved in C57BL/6NJcl ([Mekada et al., 2015](#)). Overlaps of the SNPs with mouse  
16 transcripts, muscle promoters, and enhancers regions were performed using bedtools  
17 v2.25. All SNPs overlapping predicted promoter regions (-300/+100 bp from TSS),  
18 annotated RefSeq and Ensembl transcripts, including both coding and noncoding regions,  
19 were counted. The overrepresentation rate of SNPs in pathways was calculated by applying  
20 a hypergeometric test in R.

## 1 SUPPLEMENTAL DATA

### 2 **Figure S1. Torpor Phenotype in Mice is Affected by Genetic Background, related to** 3 **Figure 1.**

4 (A) (B) Traces of  $T_B$  (red lines) and  $VO_2$  (blues lines) of the B6N male mouse at various  $T_{AS}$ .  
5 (C) Posterior distribution of the estimated slope  $a_1$  during the normal state and torpor.  
6 (D) Posterior distribution of the estimated slope  $a_2$  during the normal state and torpor.  
7 (E) Relationship between minimum  $T_B$  and  $VO_2$  seen during the normal and torpid states at  
8 various  $T_{AS}$  in B6J mice. Darkness of the dots indicates the  $T_A$ . The horizontal intercept of  
9 the line indicates the theoretical set-point of  $T_B$ , which is  $T_R$ . Note that the slope of the  $T_B$  -  
10  $VO_2$  relationship during torpor was less steep for B6J than for B6N mice, indicating that B6J  
11 had less sensitivity to  $T_B$  during torpor, consistent with the observation that B6J had a lower  
12 minimal  $T_B$  during torpor than B6N.  
13 (F) Distribution of the estimated  $\Delta H$ , the difference in  $H$  during torpor for B6N versus B6J.  
14 Red line denotes 0, and the dashed lines denote the lower and upper range of the 89%  
15 HDPI of  $\Delta H$ . Note that because the HDPI does not include 0, the  $\Delta H$  is likely to be positive  
16 at the probability of more than 89%; this can be interpreted as it being highly probable that  
17 B6N has a larger  $H$  than B6J.  
18 (G) Distribution of the estimated  $\Delta T_R$ , the difference in of  $T_R$  during torpor of B6N versus  
19 B6J. Red line denotes 0, and dashed lines denote the lower and upper range of 89% HDPI  
20 of  $\Delta T_R$ . Because the 89% HDPI do includes 0, the  $\Delta T_R$  may be 0 at a probability of 89%;  
21 this can interpreted as it being highly probable that B6N and B6J do not have different  $T_{RS}$ .  
22 (H) (I) Traces of  $T_B$  (red lines) and  $VO_2$  (blues lines) over time of B6J and B6N female mice  
23 at  $T_A = 20$  °C.  
24 (J) Posterior distribution of the difference in the estimated minimal  $T_B$  and  $VO_2$  of B6N, B6J,  
25 B6NJ-F1, and B6JN-F1 mice during torpor. Red vertical line denotes 0, and the dashed  
26 vertical lines denote the lower and upper range of the 89% HDPI of  $\Delta T_B$  or  $\Delta VO_2$ . When 0 is  
27 not included in the HDPI, the index is highly probable to have a difference. B6N had a  
28 distinct phenotype for both the minimal  $T_B$  and  $VO_2$  during torpor than from that of the other  
29 three strains.

1 **Figure S2. Fasting-induced Torpor Shows a Reversible Transcriptome Signature,**  
2 **related to Figure 2.**

3 (A) Boxplots for the  $VO_2$  of animals at sampling in reversibility experiment #2. Each dot  
4 represents one sample from one animal. The results resembled the metabolic phenotypes  
5 as detected in experiment #1. See [Figure 2B](#).

6 (B) MDS plot of the TSS-based distance in reversibility experiment #2. Each dot represents  
7 one sample from one animal. Note that the Mid group was clustered differently from the Pre  
8 and Post groups in the 1st dimension, as it were in [Figure 2C](#).

9 (C) Hierarchical clustering heatmap based on the TPM of TSS detected in the reversibility  
10 experiment #2.

11 (D) The top thirty motifs enriched in the reversible promoters.

12 (E) Logos of the top ten motifs in the reversible promoters.

- 1 **Figure S3. Torpor Prevention at High  $T_A$  Revealed Hypometabolism-associated**
- 2 **Promoters, related to Figure 3.**
- 3 (A) One B6J mouse in eight failed to enter torpor at  $T_A = 28$  °C.
- 4 (B) At  $T_A = 32$  °C, no mouse entered torpor ( $n = 4$ ).
- 5 (C) Top thirty motifs enriched in the hypometabolic promoters.
- 6 (D) Logos of the top ten motifs enriched in the hypometabolic promoters.



1 **Figure S4. Identification of Torpor-specific Promoters and their Dynamics, related to**  
2 **Figure 4.**

3 (A) Top ten enriched GO terms in the torpor specific promoters.

4 (B) Of the 13 enriched KEGG pathways, the "mTOR signaling pathway" is shown as a  
5 representative example. Green and red denote up- and down-regulated genes,  
6 respectively.

7 (C) Top thirty motifs enriched in the torpor-specific promoters.

8 (D) Logos of the top ten enriched motifs in the torpor-specific promoters.

9 (E) Distribution of the %GC in the torpor-specific promoters compared to all muscle  
10 promoters. The three horizontal lines inside the violin denote the 1st, 2nd, and 3rd quartile  
11 of the distribution from the upmost line. No significant difference was detected in this  
12 dataset.

13 (F) Boxplots for the  $VO_2$  of animals at sampling in the torpor deprivation experiment. Each  
14 dot represents one sample from one animal. Torpor-deprived animals (Dep group,  $n = 4$ )  
15 did not show an apparent change in  $VO_2$  compared to the Mid group.

16 (G) MDS plot of the TSS-based distance in the torpor-deprivation experiment. Each dot  
17 represents one sample from one animal. A clear separation between the Mid and Dep  
18 groups was not found in this analysis.

19 (H) Distribution of motifs enriched in the torpor-specific promoters. The horizontal axis  
20 denotes the position of the motif density peak from the TSS. The vertical axis denotes the  
21  $p$ -value of the enriched motif.

1 **Figure S5. Genetic Link of Distinct Torpor Phenotypes in Inbred Mice, related to**  
2 **Figure 5.**

3 (A) (B) Torpor-specific promoters that have B6N/B6J SNPs within the range of +400/-100  
4 bp from the TSS. The vertical lines denote the SNPs, which are red when included in the  
5 promoters and black when not. Among the up-regulated torpor-specific promoters, *Plin5*  
6 and *Sik3* had one SNP each. Among the down-regulated promoters, *Creb3l1* and *Lrrn1* had  
7 one, and *Bhlhe40* and *Rrad* had two SNPs in the promoter region.

1 **Table S1. Differentially Expressed Promoters During Torpor**

2

## 1 REFERENCES

- 2 Andersson, R., Gebhard, C., Miguel-Escalada, I., Hoof, I., Bornholdt, J., Boyd, M., Chen, Y.,  
3 Zhao, X., Schmidl, C., Suzuki, T., et al. (2014). An atlas of active enhancers across human  
4 cell types and tissues. *Nature* 507, 455–461.
- 5 Hoskins, R. a, Landolin, J.M., Brown, J.B., Sandler, J.E., Takahashi, H., Lassmann, T., Yu,  
6 C., Booth, B.W., Zhang, D., Wan, K.H., et al. (2011). Genome-wide analysis of promoter  
7 architecture in *Drosophila melanogaster*. *Genome Res* 21, 182–192.
- 8 Luo, W., and Brouwer, C. (2013). Pathview: an R/Bioconductor package for pathway-based  
9 data integration and visualization. *Bioinformatics* 29, 1830–1831.
- 10 Mekada, K., Hirose, M., Murakami, A., and Yoshiki, A. (2015). Development of SNP  
11 markers for C57BL/6N-derived mouse inbred strains. *Exp. Anim.* 64, 91–100.
- 12 R Core Team (2017). R: A language and environment for statistical computing.
- 13 Robinson, M.D., McCarthy, D.J., and Smyth, G.K. (2010). edgeR: a Bioconductor package  
14 for differential expression analysis of digital gene expression data. *Bioinformatics* 26, 139–  
15 140.
- 16 Stan Development Team (2016a). Stan: A C++ Library for Probability and Sampling.
- 17 Stan Development Team (2016b). RStan: the R interface to Stan.
- 18 Sunagawa, G.A., and Takahashi, M. (2016). Hypometabolism during Daily Torpor in Mice is  
19 Dominated by Reduction in the Sensitivity of the Thermoregulatory System. *Sci. Rep.* 6,  
20 37011.
- 21 Yu, G., Wang, L.-G., Han, Y., and He, Q.-Y. (2012). clusterProfiler: an R Package for  
22 Comparing Biological Themes Among Gene Clusters. *Omi. A J. Integr. Biol.* 16, 284–287.
- 23
